# Supplementary material
Source: PubMed Central journal article supplement (PMC7334828)
Supplement: NIHMS1597052-supplement-SM_2_pdf.pdf [file NIHMS1597052-supplement-SM_2_pdf.pdf]

| <b>Author(s)</b>               | <b>Year</b> | <b>Title</b>                                                                                                                                   | <b>Journal</b>                                |
|--------------------------------|-------------|------------------------------------------------------------------------------------------------------------------------------------------------|-----------------------------------------------|
| <b>Theoretical Articles</b>    |             |                                                                                                                                                |                                               |
| Anderson                       | 2015        | Autism Biomarkers: Challenges, Pitfalls and Possibilities                                                                                      | Journal of Autism and Developmental Disorders |
| Armour, Fried, & Olf           | 2017        | PTSD symptomics: network analyses in the field of psychotraumatology                                                                           | European Journal of Psychotraumatology        |
| Bakker et al.                  | 2013        | Novel directions for psychiatric diagnosis: from psychopathology to motor function to monitoring technology                                    | Epidemiology and Psychiatric Sciences         |
| Bentall                        | 2014        | The Search for Elusive Structure: A Promiscuous Realist Case for Researching Specific Psychotic Experiences Such as Hallucinations             | Schizophrenia Bulletin                        |
| Blake, Trinder, & Allen        | 2018        | Mechanisms underlying the association between insomnia, anxiety, and depression in adolescent: Implications for behavioral sleep interventions | Clinical Psychology Review                    |
| Borsboom                       | 2017        | A network theory of mental disorders                                                                                                           | World Psychiatry                              |
| Borsboom                       | 2008        | Psychometric Perspectives on Diagnostic Systems                                                                                                | Journal of Clinical Psychology                |
| Borsboom & Cramer              | 2013        | Network Analysis: An integrative Approach to the Structure of Psychopathology                                                                  | Annual Review of Clinical Psychology          |
| Borsboom et al.                | 2016        | Kinds versus continua: a review of psychometric approaches to uncover the structure of psychiatric constructs                                  | Psychological Medicine                        |
| Borsboom et al.                | 2011        | Transdiagnostic Networks: Commentary on Nolen-Hoeksema and Watkins (2011)                                                                      | Perspectives on Psychological Science         |
| Borsboom, Cramer, & Kalis      | 2018        | Brain disorders? Not really: Why network structures block reductionism in psychopathology research                                             | Behavioral and Brain Sciences                 |
| Briffault, Morgiève, & Courtet | 2018        | From e-Health to i-Health: Prospective Reflexions on the Use of intelligent Systems in Mental Health Care                                      | Brain Sciences                                |

|                                |      |                                                                                                                        |                                                                   |
|--------------------------------|------|------------------------------------------------------------------------------------------------------------------------|-------------------------------------------------------------------|
| Bringmann & Eronen             | 2018 | Don't Blame the Model: Reconsidering the Network Approach to Psychopathology                                           | Psychological Review                                              |
| Brzović, Jurjako, & Šustar     | 2017 | The Kindness of Psychopaths                                                                                            | International Studies in the Philosophy of Science                |
| Caspi & Moffitt                | 2018 | All for One and One for All: Mental Disorders in One Dimension                                                         | The American Journal of Psychiatry                                |
| Castiglioni & Laudisa          | 2015 | Toward psychiatry as a 'human' science of mind. The case of depressive disorders in DSM-5                              | Frontiers in Psychology                                           |
| Cramer et al.                  | 2016 | Major Depression as a Complex Dynamic System                                                                           | PLOS One                                                          |
| Cramer et al.                  | 2012 | Dimensions of Normal Personality as Networks in Search of Equilibrium: You Can't Like Parties if You Don't Like People | European Journal of Personality                                   |
| Cramer et al.                  | 2010 | Comorbidity: A network perspective                                                                                     | Behavioral and Brain Sciences                                     |
| Cramer et al.                  | 2010 | Complex realities require complex theories: Refining and extending the network approach to mental disorders            | Behavioral and Brain Sciences                                     |
| Cramer, Kendler, & Borsboom    | 2012 | A constructionist account of emotional disorders                                                                       | Behavioral and Brain Sciences                                     |
| Cramer, Kendler, & Borsboom    | 2011 | Where are the Genes? The Implications of a Network Perspective on Gene Hunting in Psychopathology                      | European Journal of Personality                                   |
| de Beurs                       | 2017 | Network Analysis: A Novel Approach to Understand Suicidal Behaviour                                                    | International Journal of Environmental Research and Public Health |
| de Jonge, Wardenaar, & Wichers | 2015 | What kind of thing is depression?                                                                                      | Epidemiology and Psychiatric Sciences                             |
| Eaton                          | 2015 | Latent variable and network models of comorbidity: toward an empirically derived nosology                              | Social Psychiatry and Psychiatric Epidemiology                    |

|                                    |      |                                                                                                                                                                                                                                |                                                     |
|------------------------------------|------|--------------------------------------------------------------------------------------------------------------------------------------------------------------------------------------------------------------------------------|-----------------------------------------------------|
| Fonseca-Pedrero                    | 2017 | Network analysis: A new way of understanding psychopathology?                                                                                                                                                                  | Revista de Psiquiatría y Salud Mental               |
| Fried                              | 2015 | Problematic assumptions have slowed down depression research: why symptoms, not syndromes are the way forward                                                                                                                  | Frontiers in Psychology                             |
| Fried                              | 2017 | What are psychological constructs? On the nature and statistical modelling of emotions, intelligence, personality traits and mental disorders                                                                                  | Health Psychology Review                            |
| Fried & Cramer                     | 2017 | Moving Forward: Challenges and Directions for Psychopathological Network Theory and Methodology                                                                                                                                | Perspectives on Psychological Science               |
| Fried et al.                       | 2015 | Commentary: "Consistent superiority of selective serotonin reuptake inhibitors over placebo in reducing depressed mood in patients with major depression"                                                                      | Frontiers in Psychology                             |
| Friston, Redish, & Gordon          | 2017 | Computational Nosology and Precision Psychiatry                                                                                                                                                                                | Computational Psychiatry                            |
| Granic, Lewis, & Lichwarck-Aschoff | 2018 | Complex Pathways to Psychopathology                                                                                                                                                                                            | Psychological inquiry                               |
| Guloksuz, Pries, & van Os          | 2017 | Application of network methods for understanding mental disorders: pitfalls and promise                                                                                                                                        | Psychological Medicine                              |
| Guyon, Falissard, & Kop            | 2017 | Modeling Psychological Attributes in Psychology - An Epistemological Discussion: Network Analysis vs. Latent Variables                                                                                                         | Frontiers in Psychology                             |
| Hartner & Theurer                  | 2018 | Psychiatry Should Not Seek Mechanisms of Disorder                                                                                                                                                                              | Journal of Theoretical and Philosophical Psychology |
| Hayes et al.                       | 2015 | Network destabilization and transition in depression: New methods for studying the dynamics of therapeutic change                                                                                                              | Clinical Psychology Review                          |
| Heeren & McNally                   | 2016 | A Call for Complexity in the Study of Social Anxiety Disorder. Commentary: The aetiology and maintenance of social anxiety disorder: A synthesis of complementary theoretical models and formulation of a new integrated model | Frontiers in Psychology                             |
| Held                               | 2017 | The Distinction Between Psychological Kinds and Natural Kinds Revisited: Can Updated Natural-Kind Theory Help Clinical Psychological Science and Beyond Meet Psychology's Philosophical Challenges?                            | Review of General Psychology                        |

|                             |      |                                                                                                                                                                              |                                            |
|-----------------------------|------|------------------------------------------------------------------------------------------------------------------------------------------------------------------------------|--------------------------------------------|
| Hevey, Collins, & Brogan    | 2013 | Methods: Network analysis                                                                                                                                                    | The Psychologist                           |
| Hoffart & Johnson           | 2017 | Psychodynamic and Cognitive-Behavioral Therapies Are More Different Than You Think: Conceptualizations of Mental Problems and Consequences for Studying Mechanisms of Change | Clinical Psychological Science             |
| Hofmann                     | 2014 | Toward a Cognitive-Behavioral Classification System for Mental Disorders                                                                                                     | Behavior Therapy                           |
| Hofmann & Curtiss           | 2018 | A complex network approach to clinical science                                                                                                                               | European Journal of Clinical investigation |
| Hofmann, Curtiss, & McNally | 2016 | A Complex Network Perspective on Clinical Science                                                                                                                            | Perspectives on Psychological Science      |
| Holmes et al.               | 2018 | The Lancet Psychiatry Commission on psychological treatments research in tomorrow's science                                                                                  | The Lancet Psychiatry Commission           |
| Hosseinihimeh et al.        | 2018 | Modeling and estimating the feedback mechanisms among depression, rumination, and stressors in adolescents                                                                   | PLOS One                                   |
| Isvoranu et al.             | 2016 | A Network Approach to Environmental Impact in Psychotic Disorder: Brief Theoretical Framework                                                                                | Schizophrenia Bulletin                     |
| Jones, Heeren, & McNally    | 2017 | Commentary: A network theory of mental disorders                                                                                                                             | Frontiers in Psychology                    |
| Kendler                     | 2012 | Levels of explanation in psychiatric and substance use disorders: implications for the development of an etiologically based nosology                                        | Molecular Psychiatry                       |
| Kendler                     | 2016 | The nature of psychiatric disorders                                                                                                                                          | World Psychiatry                           |
| Kendler, Zachar, & Craver   | 2011 | What kinds of things are psychiatric disorders?                                                                                                                              | Psychological Medicine                     |
| Korf                        | 2014 | Delayed mood transitions in major depressive disorder                                                                                                                        | Medical Hypotheses                         |

|                            |      |                                                                                                             |                                                                         |
|----------------------------|------|-------------------------------------------------------------------------------------------------------------|-------------------------------------------------------------------------|
| Looijestijn et al.         | 2015 | An integrated network model of psychotic symptoms                                                           | Neuroscience and Biobehavioral Reviews                                  |
| Marques & Pinto de Azevedo | 2018 | Potentialities of network analysis for sleep medicine                                                       | Journal of Psychosomatic Research                                       |
| Mason & Hsin               | 2018 | A more perfect arrangement of plants': the botanical model in psychiatric nosology, 1676 to the present day | History of Psychiatry                                                   |
| Maung                      | 2016 | Diagnosis and causal explanation in psychiatry                                                              | Studies in History and Philosophy of Biological and Biomedical Sciences |
| McGorry et al.             | 2018 | Beyond the "at risk mental state" concept: transitioning to transdiagnostic psychiatry                      | World Psychiatry                                                        |
| McNally                    | 2017 | Networks and Nosology in Posttraumatic Stress Disorder                                                      | JAMA Psychiatry                                                         |
| McNally                    | 2016 | Can network analysis transform psychopathology?                                                             | Behaviour Research and Therapy                                          |
| McNally                    | 2012 | The Ontology of Posttraumatic Stress Disorder: Natural Kind, Social Construction, or Causal System          | Clinical Psychology: Science and Practice                               |
| Micoulaud-Franchi et al.   | 2018 | Making psychiatry semiology great again: A semiologic, not nosologic challenge                              | L'Encéphale                                                             |
| Nelson et al.              | 2017 | Moving From Static to Dynamic Models of the Onset of Mental Disorder: A Review                              | JAMA Psychiatry                                                         |
| Nielsen & Ward             | 2018 | Towards a new conceptual framework for psychopathology: Embodiment, enactivism, and embedment               | Theory & Psychology                                                     |
| Nuijten et al.             | 2016 | Mental disorders as complex networks: An introduction and overview of a network approach to psychopathology | Clinical Neuropsychiatry                                                |
| Oulis                      | 2011 | Mental disorders as mechanistic property clusters                                                           | Psychological Medicine                                                  |

|                           |      |                                                                                                                                  |                                            |
|---------------------------|------|----------------------------------------------------------------------------------------------------------------------------------|--------------------------------------------|
| Porcher                   | 2016 | Delusion as a folk psychological kind                                                                                            | Unisinos Journal of Philosophy             |
| Porter                    | 2014 | Colonization by/in Psychiatry: From Over-Medicalization to Democratization                                                       | Journal of Ethics in Mental Health         |
| Radden                    | 2018 | Rethinking disease in psychiatry: Disease models and the medical imaginary                                                       | Journal of Evaluation in Clinical Practice |
| Radden                    | 2018 | Melancholy as Disease: Learning about Depression as Disease                                                                      | Philosophy, Psychiatry, & Psychology       |
| Raven                     | 2012 | Faith in measurement                                                                                                             | The Psychologist                           |
| Rikkert et al.            | 2016 | Slowing Down of Recovery as Generic Risk Marker for Acute Severity Transitions in Chronic Diseases                               | Critical Care Medicine                     |
| Rothenberger et al.       | 2010 | Comorbidity: The case of developmental psychopathology                                                                           | Behavioral and Brain Sciences              |
| Smith et al.              | 2018 | Network analysis: An innovative framework for understanding eating disorder psychopathology                                      | International Journal of Eating Disorders  |
| Snyder & Hankin           | 2017 | All Models Are Wrong, but the p Factor Model Is Useful: Reply to Widiger and Oltmanns (2017) and Bonifay, Lane, and Reise (2017) | Clinical Psychological Science             |
| Treadway & Leonard        | 2016 | Isolating biomarkers for symptomatic states: considering symptom-substrate chronometry                                           | Molecular Psychiatry                       |
| Tretter & Löffler-Stastka | 2018 | Steps Toward an integrative Clinical Systems Psychology                                                                          | Frontiers in Psychology                    |
| Tryon                     | 2018 | Mediators and Mechanisms                                                                                                         | Clinical Psychological Science             |
| Tsou                      | 2016 | Natural kinds, psychiatric classification and the history of the DSM                                                             | History of Psychiatry                      |

|                        |      |                                                                                                            |                                                                         |
|------------------------|------|------------------------------------------------------------------------------------------------------------|-------------------------------------------------------------------------|
| van Bork et al.        | 2017 | What is the p-factor of psychopathology? Some risks of general factor modeling                             | Theory & Psychology                                                     |
| van den Hout           | 2014 | Psychiatric symptoms as pathogens                                                                          | Clinical Neuropsychiatry                                                |
| van Loo & Romeijn      | 2015 | Psychiatric comorbidity: fact or artifact?                                                                 | Theoretical Medicine and Bioethics                                      |
| van Os                 | 2013 | The Dynamics of Subthreshold Psychopathology: Implications for Diagnosis and Treatment                     | American Journal of Psychiatry                                          |
| van Os                 | 2015 | The transdiagnostic dimension of psychosis: implications for psychiatric nosology and research             | Shanghai Archives of Psychiatry                                         |
| van Os et al.          | 2013 | Psychiatry beyond labels: introducing contextual precision diagnosis across stages of psychopathology      | Psychological Medicine                                                  |
| van Os et al.          | 2013 | Beyond DSM and ICD: introducing "precision diagnosis" for psychiatry using momentary assessment technology | World Psychiatry                                                        |
| Varga                  | 2018 | "Relaxed" natural kinds and psychiatric classification                                                     | Studies in History and Philosophy of Biological and Biomedical Sciences |
| Verhoeff               | 2013 | The autism puzzle: challenging a mechanistic model on conceptual and historical grounds                    | Philosophy, Ethics, and Humanities in Medicine                          |
| Vosgerau & Soom        | 2018 | Reduction Without Elimination: Mental Disorders as Causally Efficacious Properties                         | Minds & Machines                                                        |
| Walter                 | 2013 | The third wave of biological psychiatry                                                                    | Frontiers in Psychology                                                 |
| Wardenaar & de Jonge   | 2013 | Diagnostic heterogeneity in psychiatry: towards an empirical solution                                      | BMC Medicine                                                            |
| Wass & Karmiloff-Smith | 2010 | The missing developmental dimension in the network perspective                                             | Behavioral and Brain Sciences                                           |

|                                  |      |                                                                                                                  |                                                |
|----------------------------------|------|------------------------------------------------------------------------------------------------------------------|------------------------------------------------|
| Weiskopf                         | 2017 | An ideal disorder? Autism as a psychiatric kinds                                                                 | Philosophical Explorations                     |
| Wichers                          | 2014 | The dynamic nature of depression: a new micro-level perspective of mental disorder that meets current challenges | Psychological Medicine                         |
| Wichers et al.                   | 2017 | Mental disorders as networks: some cautionary reflections on a promising approach                                | Social Psychiatry and Psychiatric Epidemiology |
| Wichers, Wigman, & Myrin-Germeys | 2015 | Micro-Level Affect Dynamics in Psychopathology Viewed from Complex Dynamical System Theory                       | Emotion Review                                 |
| Wittenborn et al.                | 2016 | Depression as a systemic syndrome: mapping the feedback loops of major depressive disorder                       | Psychological Medicine                         |
| Yordanova et al.                 | 2010 | Comorbidity in the context of neural network properties                                                          | Behavioral and Brain Sciences                  |
| Young                            | 2015 | Causality in Psychiatry: A Hybrid Symptom Network Construct Model                                                | Frontiers in Psychology                        |
| Zachar                           | 2015 | Psychiatric disorders: natural kinds made by the world or practical kinds made by us?                            | World Psychiatry                               |
| Zachar, First, & Kendler         | 2017 | The Bereavement Exclusion Debate in the DSM-5: A History                                                         | Clinical Psychological Science                 |
| <b>Methodological Articles</b>   |      |                                                                                                                  |                                                |
| Adolf et al.                     | 2017 | Capturing Context-Related Change in Emotional Dynamics via Fixed Moderated Time Series Analysis                  | Multivariate Behavioral Research               |
| Beltz & Gates                    | 2017 | Network Mapping with GIMME                                                                                       | Multivariate Behavioral Research               |
| Blanken et al.                   | 2018 | The role of stabilizing and communicating symptoms given overlapping communities in psychopathology networks     | Scientific Reports                             |



|                       |      |                                                                                                                       |                                                                  |
|-----------------------|------|-----------------------------------------------------------------------------------------------------------------------|------------------------------------------------------------------|
| Bos & Wanders         | 2016 | Group-Level Symptom Networks in Depression                                                                            | JAMA Psychiatry                                                  |
| Boschloo              | 2018 | Zooming in and Zooming Out: A Network Perspective on the Comorbidity of Depression and Anxiety                        | Journal of the American Academy of Child & Adolescent Psychiatry |
| Bringmann et al.      | 2018 | Modeling Nonstationary Emotion Dynamics in Dyads using a Time-Varying Vector-Autoregressive Model                     | Multivariate Behavioral Research                                 |
| Bringmann et al.      | 2013 | A Network Approach to Psychopathology: New insights into Clinical Longitudinal Data                                   | PLOS One                                                         |
| Bringmann et al.      | 2017 | Changing Dynamics: Time-Varying Autoregressive Models Using Generalized Additive Modeling                             | Psychological Methods                                            |
| Bulteel et al.        | 2016 | Clustering Vector Autoregressive Models: Capturing Qualitative Differences in Within-Person Dynamics                  | Frontiers in Psychology                                          |
| Bulteel et al.        | 2016 | Using Raw VAR Regression Coefficients to Build Networks can be Misleading                                             | Multivariate Behavioral Research                                 |
| Bulteel et al.        | 2018 | Improved insight into and Prediction of Network Dynamics by Combining VAR and Dimension Reduction                     | Multivariate Behavioral Research                                 |
| Capobianco            | 2015 | Comorbidity networks: beyond disease correlations                                                                     | Journal of Complex Networks                                      |
| Chen et al.           | 2018 | Robust Measurement via a Fused Latent and Graphical Item Response Theory Model                                        | Psychometrika                                                    |
| Christensen           | 2018 | NetworkToolbox: Methods and Measures for Brain, Cognitive, and Psychometric Network Analysis in R                     | The R Journal                                                    |
| Christensen et al.    | 2018 | Network structure of the Wisconsin Schizotypy Scales-Short Forms: Examining psychometric network filtering approaches | Behavior Research Methods                                        |
| Costantini & Perugini | 2014 | Generalization of Clustering Coefficients to Signed Correlation Networks                                              | PLOS One                                                         |

|                                |      |                                                                                                                                        |                                                       |
|--------------------------------|------|----------------------------------------------------------------------------------------------------------------------------------------|-------------------------------------------------------|
| Costantini et al.              | 2015 | State of the aRt personality research: A tutorial on network analysis of personality data in R                                         | Journal of Research in Personality                    |
| Cramer                         | 2012 | Why the Item "23+1" Is Not in a Depression Questionnaire: Validity From a Network Perspective                                          | Measurement: interdisciplinary Research & Perspective |
| DeYoung & Krueger              | 2018 | Understanding Psychopathology: Cybernetics and Psychology on the Boundary between Order and Chaos                                      | Psychological inquiry                                 |
| Epskamp & Fried                | 2018 | A Tutorial on Regularized Partial Correlation Networks                                                                                 | Psychological Methods                                 |
| Epskamp et al.                 | 2018 | Personalized Network Modeling in Psychopathology: The Importance of Contemporaneous and Temporal Connections                           | Clinical Psychological Science                        |
| Epskamp et al.                 | 2012 | qgraph: Network Visualizations of Relationships in Psychometric Data                                                                   | Journal of Statistical Software                       |
| Epskamp et al.                 | 2018 | The Gaussian Graphical Model in Cross-Sectional and Time-Series Data                                                                   | Multivariate Behavioral Research                      |
| Epskamp, Borsboom, & Fried     | 2018 | Estimating psychological networks and their accuracy: A tutorial paper                                                                 | Behavior Research Methods                             |
| Epskamp, Kruis, & Marsman      | 2017 | Estimating psychopathological networks: Be careful what you wish for                                                                   | PLOS One                                              |
| Epskamp, Rhemtulla, & Borsboom | 2017 | Generalized Network Psychometrics: Combining Network and Latent Variable Models                                                        | Psychometrika                                         |
| Forbes et al.                  | 2017 | Further evidence that psychopathology networks have limited replicability and utility: Response to Borsboom et al. and Steinley et al. | Journal of Abnormal Psychology                        |
| Furr et al.                    | 2012 | On the Contributions of a Network Approach to Personality Theory and Research                                                          | European Journal of Personality                       |
| Golino & Epskamp               | 2017 | Exploratory graph analysis: A new approach for estimating the number of dimensions in psychological research                           | PLOS One                                              |

|                                   |      |                                                                                                                                           |                                                           |
|-----------------------------------|------|-------------------------------------------------------------------------------------------------------------------------------------------|-----------------------------------------------------------|
| Haan-Rietdijk et al.              | 2017 | Discrete- vs. Continuous-Time Modeling of Unequally Spaced Experience Sampling Method Data                                                | Frontiers in Psychology                                   |
| Haan-Rietdijk, Kuppens, & Hamaker | 2016 | What's in a Day? A Guide to Decomposing the Variance in intensive Longitudinal Data                                                       | Frontiers in Psychology                                   |
| Hamaker & Wichers                 | 2017 | No Time Like the Present: Discovering the Hidden Dynamics in intensive Longitudinal Data                                                  | Current Directions in Psychological Science               |
| Hamaker et al.                    | 2015 | Modeling Affect Dynamics: State of the Art and Future Challenges                                                                          | Emotion Review                                            |
| Haslbeck & Waldorp                | 2018 | How well do network models predict observations? On the importance of predictability in network models                                    | Behavior Research Methods                                 |
| Hoffman et al.                    | 2018 | Criteria Definitions and Network Relations: The Importance of Criterion Thresholds                                                        | Clinical Psychological Science                            |
| Hoijtink, Béland, & Vermeulen     | 2014 | Cognitive Diagnostic Assessment via Bayesian Evaluation of informative Diagnostic Hypotheses                                              | Psychological Methods                                     |
| Huys, Maia, & Frank               | 2016 | Computational psychiatry as a bridge from neuroscience to clinical applications                                                           | Nature Neuroscience                                       |
| Jones, Mair, & McNally            | 2018 | Visualizing Psychological Networks: A Tutorial in R                                                                                       | Frontiers in Psychology                                   |
| Krone et al.                      | 2017 | A Multivariate Statistical Model for Emotion Dynamics                                                                                     | Emotion                                                   |
| Kruis & Maris                     | 2016 | Three representations of the Ising model                                                                                                  | Scientific Reports                                        |
| Kuiper & Ryan                     | 2018 | Drawing Conclusions from Cross-Lagged Relationships: Re-Considering the Role of the Time-interval                                         | Structural Equation Modeling: A Multidisciplinary Journal |
| Markon & Jonas                    | 2016 | Structure as Cause and Representation: Implications of Descriptivist inference for Structural Modeling Across Multiple Levels of Analysis | Journal of Abnormal Psychology                            |

|                                |      |                                                                                                                                                              |                                   |
|--------------------------------|------|--------------------------------------------------------------------------------------------------------------------------------------------------------------|-----------------------------------|
| Marsman et al.                 | 2018 | An introduction to Network Psychometrics: Relating Ising Network Models to Item Response Theory Models                                                       | Multivariate Behavioral Research  |
| Marsman et al.                 | 2015 | Bayesian inference for low-rank Ising networks                                                                                                               | Scientific Reports                |
| Masuda, Kojaku, & Sano         | 2018 | Configuration model for correlation matrices preserving the node strength                                                                                    | Physical Review                   |
| Myin-Germeys et al.            | 2018 | Experience sampling methodology in mental health research: new insights and technical developments                                                           | World Psychiatry                  |
| Penna et al.                   | 2018 | Psychometric methods: The need for new conceptual advances                                                                                                   | Measurement                       |
| Schmittmann et al.             | 2013 | Deconstructing the construct: A network perspective on psychological phenomena                                                                               | New Ideas in Psychology           |
| Schuurman et al.               | 2016 | How to Compare Cross-Lagged Associations in a Multilevel Autoregressive Model                                                                                | Psychological Methods             |
| Schuurman, Houtveen, & Hamaker | 2015 | incorporating measurement error in $n = 1$ psychological autoregressive modeling                                                                             | Frontiers in Psychology           |
| Sened et al.                   | 2018 | The Use of intensive Longitudinal Methods in Explanatory Personality Research                                                                                | European Journal of Personality   |
| Spanakis et al.                | 2016 | Network Analysis of Ecological Momentary Assessment Data for Monitoring and Understanding Eating Behavior                                                    | Lecture Notes in Computer Science |
| Steinley et al.                | 2017 | A Method for Making inferences in Network Analysis: Comment on Forbes, Wright, Markon, and Krueger (2017)                                                    | Journal of Abnormal Psychology    |
| Terluin, de Boer, & de Vet     | 2016 | Differences in Connection Strength between Mental Symptoms Might Be Explained by Differences in Variance: Reanalysis of Network Data Did Not Confirm Staging | PLOS One                          |
| Tzur-Bitan, Meiran, & Shahar   | 2010 | The importance of modeling comorbidity using an intra-individual, time-series approach                                                                       | Behavioral and Brain Sciences     |

|                                 |      |                                                                                                                                                          |                                                                   |
|---------------------------------|------|----------------------------------------------------------------------------------------------------------------------------------------------------------|-------------------------------------------------------------------|
| van Borkulo et al.              | 2014 | A new method for constructing networks from binary data                                                                                                  | Scientific Reports                                                |
| van der Krieke et al.           | 2016 | HowNutsAreTheDutch (HoeGekIsNL): A crowdsourcing study of mental symptoms and strengths                                                                  | International Journal of Methods in Psychiatric Research          |
| Zhao et al.                     | 2017 | Statistical inference for community detection in signed networks                                                                                         | Physical Review                                                   |
| <b>Empirical Articles</b>       |      |                                                                                                                                                          |                                                                   |
| Afzali et al.                   | 2017 | Network approach to the symptom-level association between alcohol use disorder and posttraumatic stress disorder                                         | Social Psychiatry and Psychiatric Epidemiology                    |
| Afzali et al.                   | 2017 | A network approach to the comorbidity between posttraumatic stress disorder and major depressive disorder: The role of overlapping symptoms              | Journal of Affective Disorders                                    |
| Anderson, Montazeri, & de Bildt | 2015 | Network Approach to Autistic Traits: Group and Subgroup Analyses of ADOS Item Scores                                                                     | Journal of Autism and Developmental Disorders                     |
| Anker et al.                    | 2017 | A Network Approach to Modeling Comorbid internalizing and Alcohol Use Disorders                                                                          | Journal of Abnormal Psychology                                    |
| Armour et al.                   | 2017 | A network analysis of DSM-5 posttraumatic stress disorder symptoms and correlates in US military veterans                                                | Journal of Anxiety Disorders                                      |
| Baggio et al.                   | 2018 | Technology-Mediated Addictive Behaviors Constitute a Spectrum of Related Yet Distinct Conditions: A Network Perspective                                  | Psychology of Addictive Behaviors                                 |
| Baggio et al.                   | 2018 | Gender differences in gambling preferences and problem gambling: a network-level analysis                                                                | International Gambling Studies                                    |
| Baggio et al.                   | 2016 | Co-morbidity of gambling and internet use among internet and land-based gamblers: classic and network approaches                                         | International Gambling Studies                                    |
| Baggio et al.                   | 2018 | Comorbidity of Symptoms of Alcohol and Cannabis Use Disorders among a Population-Based Sample of Simultaneous Users. Insight from a Network Perspective. | International Journal of Environmental Research and Public Health |

|                              |      |                                                                                                                                                                                                                              |                                                |
|------------------------------|------|------------------------------------------------------------------------------------------------------------------------------------------------------------------------------------------------------------------------------|------------------------------------------------|
| Bak et al.                   | 2016 | An n=1 Clinical Network Analysis of Symptoms and Treatment in Psychosis                                                                                                                                                      | PLOS One                                       |
| Bakker et al.                | 2017 | Real-Life Validation of Reduced Reward Processing in Emerging Adults With Depressive Symptoms                                                                                                                                | Journal of Abnormal Psychology                 |
| Beard et al.                 | 2016 | Network analysis of depression and anxiety symptom relationships in a psychiatric sample                                                                                                                                     | Psychological Medicine                         |
| Bekhuis et al.               | 2018 | Symptom-Specific Effects of Psychotherapy versus Combined Therapy in the Treatment of Mild to Moderate Depression: A Network Approach.                                                                                       | Psychotherapy and Psychosomatics               |
| Bekhuis et al.               | 2016 | The network structure of major depressive disorder, generalized anxiety disorder and somatic symptomatology.                                                                                                                 | Psychological Medicine                         |
| Bell & Driscoll              | 2018 | The network structure of paranoia in the general population                                                                                                                                                                  | Social Psychiatry and Psychiatric Epidemiology |
| Bellet et al.                | 2018 | Bereavement Outcomes as Causal Systems: A Network Analysis of the Co-Occurrence of Complicated Grief and Posttraumatic Growth                                                                                                | Clinical Psychological Science                 |
| Benfer et al.                | 2018 | Network models of posttraumatic stress symptoms across trauma types                                                                                                                                                          | Journal of Anxiety Disorders                   |
| Bernstein, Heeren, & McNally | 2017 | Unpacking Rumination and Executive Control: A Network Perspective                                                                                                                                                            | Clinical Psychological Science                 |
| Birkeland & Heir             | 2017 | Making connections: exploring the centrality of posttraumatic stress symptoms and covariates after a terrorist attack                                                                                                        | European Journal of Psychotraumatology         |
| Birkeland et al.             | 2017 | Gender Differences in Posttraumatic Stress Symptoms after a Terrorist Attack: A Network Approach                                                                                                                             | Frontiers in Psychology                        |
| Bodner et al.                | 2018 | Affective family interactions and their associations with adolescent depression: A dynamic network approach                                                                                                                  | Development and Psychopathology                |
| Booij et al.                 | 2018 | Study protocol for a prospective cohort study examining the predictive potential of dynamic symptom networks for the onset and progression of psychosis: the Mapping individual Routes of Risk and Resilience (Mirorr) study | BMJ Open                                       |

|                  |      |                                                                                                                                                                      |                                                |
|------------------|------|----------------------------------------------------------------------------------------------------------------------------------------------------------------------|------------------------------------------------|
| Borsboom et al.  | 2017 | False Alarm? A Comprehensive Reanalysis of "Evidence That Psychopathology Symptom Networks Have Limited Replicability" by Forbes, Wright, Markon, and Krueger (2017) | Journal of Abnormal Psychology                 |
| Borsboom et al.  | 2011 | The Small World of Psychopathology                                                                                                                                   | PLOS One                                       |
| Bos et al.       | 2018 | Cross-sectional networks of depressive symptoms before and after antidepressant medication treatment.                                                                | Social Psychiatry and Psychiatric Epidemiology |
| Bos et al.       | 2017 | Can We Jump from Cross-Sectional to Dynamic interpretations of Networks? Implications for the Network Perspective in Psychiatry.                                     | Psychotherapy and Psychosomatics               |
| Boschloo et al.  | 2016 | A Prospective Study on How Symptoms in a Network Predict the Onset of Depression                                                                                     | Psychotherapy and Psychosomatics               |
| Boschloo et al.  | 2015 | The Network Structure of Symptoms of the Diagnostic and Statistical Manual of Mental Disorders                                                                       | PLOS One                                       |
| Boschloo et al.  | 2016 | The network structure of psychopathology in a community sample of preadolescents.                                                                                    | Journal of Abnormal Psychology                 |
| Bouwman et al.   | 2018 | The person-specific interplay of melatonin, affect, and fatigue in the context of sleep and depression.                                                              | Personality and Individual Differences         |
| Briganti et al.  | 2018 | Network analysis of empathy items from the interpersonal reactivity index in 1973 young adults                                                                       | Psychiatry Research                            |
| Bringmann et al. | 2016 | Assessing Temporal Emotion Dynamics Using Networks                                                                                                                   | Assessment                                     |
| Bringmann et al. | 2015 | Revealing the dynamic network structure of the Beck Depression inventory-II                                                                                          | Psychological Medicine                         |
| Bryant et al.    | 2017 | Acute and Chronic Posttraumatic Stress Symptoms in the Emergence of Posttraumatic Stress Disorder A Network Analysis                                                 | JAMA Psychiatry                                |
| Carney et al.    | 2018 | Residual Symptoms After Treatment for Depression in Patients With Coronary Heart Disease                                                                             | Psychosomatic Medicine                         |

|                                   |      |                                                                                                                                                            |                                                      |
|-----------------------------------|------|------------------------------------------------------------------------------------------------------------------------------------------------------------|------------------------------------------------------|
| Choi et al.                       | 2017 | Applying Network Analysis to Psychological Comorbidity and Health Behavior: Depression, PTSD, and Sexual Risk in Sexual Minority Men With Trauma Histories | Journal of Consulting and Clinical Psychology        |
| Choi et al.                       | 2015 | Disease network of mental disorders in Korea                                                                                                               | Social Psychiatry and Psychiatric Epidemiology       |
| Coêlho et al.                     | 2018 | The role of gender in the structure of networks of childhood adversity.                                                                                    | Psychiatry Research                                  |
| Cramer et al.                     | 2012 | The pathoplasticity of dysphoric episodes: Differential impact of stressful life events on the pattern of depressive symptom inter-correlations.           | Psychological Medicine                               |
| Curtiss & Klemanski               | 2016 | Taxonicity and network structure of generalized anxiety disorder and major depressive disorder: An admixture analysis and complex network analysis         | Journal of Affective Disorders                       |
| Curtiss et al.                    | 2018 | Longitudinal Network Stability of the Functional Impairment of Anxiety and Depression                                                                      | Clinical Psychological Science                       |
| David et al.                      | 2018 | Intraindividual Dynamic Network Analysis - Implications for Clinical Assessment                                                                            | Journal of Psychopathology and Behavioral Assessment |
| de Beurs et al.                   | 2018 | The association between motives, perceived problems and current thoughts of self-harm following an episode of self-harm. A network analysis                | Journal of Affective Disorders                       |
| de Beurs, van Borkulo, & O'Connor | 2017 | Association between suicidal symptoms and repeat suicidal behaviour within a sample of hospital-treated suicide attempters                                 | BJPsych Open                                         |
| De Schryver et al.                | 2015 | Unpacking Constructs: A Network Approach for Studying War Exposure, Daily Stressors and Post-Traumatic Stress Disorder                                     | Frontiers in Psychology                              |
| de Vos et al.                     | 2017 | An investigation of emotion dynamics in major depressive disorder patients and healthy persons using sparse longitudinal networks                          | PLOS One                                             |
| Dejonckheere et al.               | 2017 | Perceiving social pressure not to feel negative predicts depressive symptoms in daily life                                                                 | Depression and Anxiety                               |
| Deserno et al.                    | 2018 | Relating ASD symptoms to well-being: moving across different construct levels                                                                              | Psychological Medicine                               |



|                            |      |                                                                                                                                                 |                                           |
|----------------------------|------|-------------------------------------------------------------------------------------------------------------------------------------------------|-------------------------------------------|
| Deserno et al.             | 2017 | Multicausal systems ask for multicausal approaches: A network perspective on subjective well-being in individuals with autism spectrum disorder | Autism                                    |
| Dooley et al.              | 2018 | The role of inflammation in core features of depression: insights from paradigms using exogenously-induced inflammation                         | Neuroscience and Biobehavioral Reviews    |
| DuBois et al.              | 2017 | A network analysis investigation of the cognitive-behavioral theory of eating disorders                                                         | Behaviour Research and Therapy            |
| Elovainio et al.           | 2018 | The Network Structure of Childhood Psychopathology in International Adoptees                                                                    | Journal of Child and Family Studies       |
| Engert et al.              | 2018 | Exploring the multidimensional complex systems structure of the stress response and its relation to health and sleep outcomes                   | Brain Behavior and Immunity               |
| Esfahlani et al.           | 2018 | A network-based classification framework for predicting treatment response of schizophrenia patients                                            | Expert Systems with Applications          |
| Esfahlani et al.           | 2017 | Sensitivity of the Positive and Negative Syndrome Scale (PANSS) in detecting treatment effects via network analysis.                            | Innovations in Clinical Neuroscience      |
| Evans et al.               | 2015 | Examining the shared and unique features of self-concept content and structure in borderline personality disorder and depression.               | Cognitive Therapy and Research            |
| Fisher et al.              | 2017 | Exploring the Idiographic Dynamics of Mood and Anxiety via Network Analysis                                                                     | Journal of Abnormal Psychology            |
| Fonseca-Pedrero et al.     | 2018 | The Network Structure of Schizotypal Personality Traits                                                                                         | Schizophrenia Bulletin                    |
| Forbes et al.              | 2017 | Evidence That Psychopathology Symptom Networks Have Limited Replicability                                                                       | Journal of Abnormal Psychology            |
| Forbush, Siew, & Vitevitch | 2016 | Application of network analysis to identify interactive systems of eating disorder psychopathology                                              | Psychological Medicine                    |
| Forrest et al.             | 2018 | Core psychopathology in anorexia nervosa and bulimia nervosa: A network analysis                                                                | International Journal of Eating Disorders |

|                                  |      |                                                                                                                                                                                    |                                                |
|----------------------------------|------|------------------------------------------------------------------------------------------------------------------------------------------------------------------------------------|------------------------------------------------|
| Frewen et al.                    | 2013 | Perceived causal relations between anxiety, posttraumatic stress and depression: extension to moderation, mediation, and network analysis                                          | European Journal of Psychotraumatology         |
| Frewen et al.                    | 2012 | Perceived Causal Relations: Novel Methodology for Assessing Client Attributions About Causal Associations Between Variables including Symptoms and Functional Impairment           | Assessment                                     |
| Fried & Nesse                    | 2015 | Depression sum-scores don't add up: why analyzing specific depression symptoms is essential                                                                                        | BMC Medicine                                   |
| Fried et al.                     | 2018 | Replicability and Generalizability of Posttraumatic Stress Disorder (PTSD) Networks: A Cross-Cultural Multisite Study of PTSD Symptoms in Four Trauma Patient Samples              | Clinical Psychological Science                 |
| Fried et al.                     | 2017 | Mental disorders as networks of problems: a review of recent insights                                                                                                              | Social Psychiatry and Psychiatric Epidemiology |
| Fried et al.                     | 2016 | What are 'good' depression symptoms? Comparing the centrality of DSM and non-DSM symptoms of depression in a network analysis                                                      | Journal of Affective Disorders                 |
| Fried et al.                     | 2015 | From Loss to Loneliness: The Relationship Between Bereavement and Depressive Symptoms                                                                                              | Journal of Abnormal Psychology                 |
| Fried et al.                     | 2014 | Depression is more than the sum score of its parts: individual DSM symptoms have different risk factors.                                                                           | Psychological Medicine                         |
| Fritz et al.                     | 2018 | A Network Model of Resilience Factors for Adolescents with and without Exposure to Childhood Adversity                                                                             | Scientific Reports                             |
| Galderisi et al.                 | 2018 | Interplay Among Psychopathologic Variables, Personal Resources, Context-Related Factors, and Real-life Functioning in individuals With Schizophrenia A Network Analysis            | JAMA Psychiatry                                |
| Gluck, Knefel, & Lueger-Schuster | 2017 | A network analysis of anger, shame, proposed ICD-11 post-traumatic stress disorder, and different types of childhood trauma in foster care settings in a sample of adult survivors | European Journal of Psychotraumatology         |
| Goekoop & Goekoop                | 2014 | A Network View on Psychiatric Disorders: Network Clusters of Symptoms as Elementary Syndromes of Psychopathology                                                                   | PLOS One                                       |
| Goldschmidt et al.               | 2018 | Network Analysis of Pediatric Eating Disorder Symptoms in a Treatment-Seeking, Transdiagnostic Sample                                                                              | Journal of Abnormal Psychology                 |

|                              |      |                                                                                                                                                                                        |                                |
|------------------------------|------|----------------------------------------------------------------------------------------------------------------------------------------------------------------------------------------|--------------------------------|
| Greene et al.                | 2018 | Dynamic networks of PTSD symptoms during conflict.                                                                                                                                     | Psychological Medicine         |
| Guloksuz et al.              | 2016 | Exposure to environmental factors increases connectivity between symptom domains in the psychopathology network                                                                        | BMC Psychiatry                 |
| Guloksuz et al.              | 2015 | Evidence that the presence of psychosis in non-psychotic disorder is environment-dependent and mediated by severity of non-psychotic psychopathology                                   | Psychological Medicine         |
| Gunst et al.                 | 2018 | A network analysis of female sexual function: comparing symptom networks in women with decreased, increased, and stable sexual desire                                                  | Scientific Reports             |
| Hamaker, Grasman, & Kamphuis | 2016 | Modeling BAS Dysregulation in Bipolar Disorder: Illustrating the Potential of Time Series Analysis                                                                                     | Assessment                     |
| Haslbeck & Fried             | 2017 | How predictable are symptoms in psychopathological networks? A reanalysis of 18 published datasets                                                                                     | Psychological Medicine         |
| Hasmi et al.                 | 2017 | Network Approach to Understanding Emotion Dynamics in Relation to Childhood Trauma and Genetic Liability to Psychopathology: Replication of a Prospective Experience Sampling Analysis | Frontiers in Psychology        |
| Hasmi et al.                 | 2018 | Genetic and Environmental Influences on the Affective Regulation Network: A Prospective Experience Sampling Analysis.                                                                  | Frontiers in Psychiatry        |
| Hasson-Ohayon                | 2018 | Overlap and distinction between measures of insight and self-stigma                                                                                                                    | Psychiatry Research            |
| Hasson-Ohayon et al.         | 2018 | The centrality of cognitive symptoms and metacognition within the interacting network of symptoms, neurocognition, social cognition and metacognition in schizophrenia.                | Schizophrenia Research         |
| Hayes & Yasinski             | 2015 | Pattern destabilization and emotional processing in cognitive therapy for personality disorders                                                                                        | Frontiers in Psychology        |
| Heeren & McNally             | 2018 | Social Anxiety Disorder as a Densely interconnected Network of Fear and Avoidance for Social Situations                                                                                | Cognitive Therapy and Research |
| Heeren & McNally             | 2016 | An integrative network approach to social anxiety disorder: The complex dynamic interplay among attentional bias for threat, attentional control, and symptoms                         | Journal of Anxiety Disorders   |

|                              |      |                                                                                                                                                                |                                               |
|------------------------------|------|----------------------------------------------------------------------------------------------------------------------------------------------------------------|-----------------------------------------------|
| Heeren, Bernstein, & McNally | 2018 | Deconstructing trait anxiety: a network perspective                                                                                                            | Anxiety, Stress, and Coping                   |
| Heeren, Jones, & McNally     | 2018 | Mapping network connectivity among symptoms of social anxiety and comorbid depression in people with social anxiety disorder                                   | Journal of Affective Disorders                |
| Hinton et al.                | 2016 | A Transcultural Model of the Centrality of "Thinking a Lot" in Psychopathologies Across the Globe and the Process of Localization: A Cambodian Refugee Example | Culture Medicine and Psychiatry               |
| Hoffart                      | 2018 | The interplay between experiential states in first generation schema therapy of Cluster C personality problems: A network approach.                            | Clinical Psychology & Psychotherapy           |
| Hoorelbeke et al.            | 2016 | The interplay between cognitive risk and resilience factors in remitted depression: A network analysis                                                         | Journal of Affective Disorders                |
| Hosenfeld et al.             | 2015 | Major depressive disorder as a nonlinear dynamic system: Bimodality in the frequency distribution of depressive symptoms over time.                            | BMC Psychiatry                                |
| Howard, Khalifa, & Duggan    | 2014 | Antisocial personality disorder comorbid with borderline pathology and psychopathy is associated with severe violence in a forensic sample                     | Journal of Forensic Psychiatry & Psychology   |
| Hukkelberg & Ogden           | 2018 | Dimensionality of oppositional defiant disorder                                                                                                                | Child and Adolescent Mental Health            |
| Ibrahim et al.               | 2016 | Mapping the network of neuropsychological impairment in children with autism spectrum disorder: A graph theoretical analysis.                                  | Journal of Autism and Developmental Disorders |
| Isvoranu et al.              | 2017 | A Network Approach to Psychosis: Pathways Between Childhood Trauma and Psychotic Symptoms                                                                      | Schizophrenia Bulletin                        |
| Jaya et al.                  | 2017 | Loneliness and Psychotic Symptoms: The Mediating Role of Depression                                                                                            | Cognitive Therapy and Research                |
| Jayawickreme et al.          | 2017 | Post-conflict struggles as networks of problems: A network analysis of trauma, daily stressors and psychological distress among Sri Lankan war survivors       | Social Science & Medicine                     |
| Johnson & Hoffart            | 2018 | Metacognitive therapy versus cognitive behavioral therapy: A network approach.                                                                                 | Frontiers in Psychology                       |

|                                 |      |                                                                                                                                                                                                        |                                                    |
|---------------------------------|------|--------------------------------------------------------------------------------------------------------------------------------------------------------------------------------------------------------|----------------------------------------------------|
| Jones et al.                    | 2018 | A network perspective on comorbid depression in adolescents with obsessive-compulsive disorder                                                                                                         | Journal of Anxiety Disorders                       |
| Kendler et al.                  | 2018 | The centrality of DSM and non-DSM depressive symptoms in Han Chinese women with major depression.                                                                                                      | Journal of Affective Disorders                     |
| Klippel et al.                  | 2017 | Modeling the Interplay Between Psychological Processes and Adverse, Stressful Contexts and Experiences in Pathways to Psychosis: An Experience Sampling Study.                                         | Schizophrenia Bulletin                             |
| Klippel et al.                  | 2018 | The cascade of stress: A network approach to explore differential dynamics in populations varying in risk for psychosis.                                                                               | Schizophrenia Bulletin                             |
| Knefel, Tran, & Lueger-Schuster | 2016 | The association of posttraumatic stress disorder, complex posttraumatic stress disorder, and borderline personality disorder from a network analytical perspective                                     | Journal of Anxiety Disorders                       |
| Koenders et al.                 | 2015 | A Network Approach to Bipolar Symptomatology in Patients with Different Course Types                                                                                                                   | PLOS One                                           |
| Kok & Singer                    | 2017 | Phenomenological Fingerprints of Four Meditations: Differential State Changes in Affect, Mind-Wandering, Meta-Cognition, and interoception Before and After Daily Practice Across 9 Months of Training | Mindfulness                                        |
| Kossakowski et al.              | 2016 | The application of a network approach to Health-Related Quality of Life (HRQoL): introducing a new method for assessing HRQoL in healthy adults and cancer patients                                    | Quality of Life Research                           |
| Kuittinen et al.                | 2017 | Construct validity of the HSCL-25 and SCL-90-Somatization scales among Russian, Somali and Kurdish origin migrants in Finland.                                                                         | International Journal of Culture and Mental Health |
| LeBlanc et al.                  | 2016 | PTSD and Romantic Relationship Satisfaction: Cluster- and Symptom-Level Analyses                                                                                                                       | Journal of Traumatic Stress                        |
| Levine & Leucht                 | 2016 | Identifying a system of predominant negative symptoms: Network analysis of three randomized clinical trials.                                                                                           | Schizophrenia Research                             |
| Levinson et al.                 | 2017 | The Core Symptoms of Bulimia Nervosa, Anxiety, and Depression: A Network Analysis                                                                                                                      | Journal of Abnormal Psychology                     |
| Levinson et al.                 | 2018 | Network Analysis as an Alternative Approach to Conceptualizing Eating Disorders: Implications for Research and Treatment                                                                               | Current Psychiatry Reports                         |

|                                  |      |                                                                                                                                                     |                                           |
|----------------------------------|------|-----------------------------------------------------------------------------------------------------------------------------------------------------|-------------------------------------------|
| Levinson et al.                  | 2018 | Social anxiety and eating disorder comorbidity and underlying vulnerabilities: Using network analysis to conceptualize comorbidity                  | International Journal of Eating Disorders |
| Levinson, Vanzhula, & Brosiof    | 2018 | Longitudinal and personalized networks of eating disorder cognitions and behaviors: Targets for precision intervention a proof of concept study.    | International Journal of Eating Disorders |
| Lutz et al.                      | 2018 | Using network analysis for the prediction of treatment dropout in patients with mood and anxiety disorders: A methodological proof-of-concept study | Scientific Reports                        |
| Lydon-Staley et al.              | 2018 | The Network Structure of Tobacco Withdrawal in a Community Sample of Smokers Treated with Nicotine Patch and Behavioral Counseling.                 | Nicotine & Tobacco Research               |
| Maccallum, Malgaroli, & Bonanno  | 2017 | Networks of Loss: Relationships Among Symptoms of Prolonged Grief Following Spousal and Parental Loss                                               | Journal of Abnormal Psychology            |
| Madhoo & Levine                  | 2016 | Network analysis of the Quick inventory of Depressive Symptomatology: Reanalysis of the STAR*D clinical trial                                       | European Neuropsychopharmacology          |
| Maij et al.                      | 2017 | Mentalizing skills do not differentiate believers from non-believers, but credibility enhancing displays do                                         | PLOS One                                  |
| Malgaroli, Maccallum, & Bonanno  | 2018 | Symptoms of persistent complex bereavement disorder, depression, and PTSD in a conjugally bereaved sample: a network analysis                       | Psychological Medicine                    |
| Marchetti et al.                 | 2016 | Unveiling the Structure of Cognitive Vulnerability for Depression: Specificity and Overlap                                                          | PLOS One                                  |
| Marcus, Preszler, & Zeigler-Hill | 2018 | A network of dark personality traits: What lies at the heart of darkness?                                                                           | Journal of Research in Personality        |
| Martel et al.                    | 2017 | Impulsivity Symptoms as Core to the Developmental Externalizing Spectrum                                                                            | Journal of Abnormal Child Psychology      |
| Martel et al.                    | 2016 | A Network Analysis of Developmental Change in ADHD Symptom Structure From Preschool to Adulthood                                                    | Clinical Psychological Science            |
| McBride et al.                   | 2016 | The Role of Specific Alcohol-Related Problems in Predicting Depressive Experiences in a Cross-Sectional National Household Survey                   | Alcohol and Alcoholism                    |

|                              |      |                                                                                                                                           |                                        |
|------------------------------|------|-------------------------------------------------------------------------------------------------------------------------------------------|----------------------------------------|
| McElroy et al.               | 2018 | Co-occurring internalizing and externalizing psychopathology in childhood and adolescence: a network approach                             | European Child & Adolescent Psychiatry |
| McNally et al.               | 2017 | Co-morbid obsessive-compulsive disorder and depression: a Bayesian network approach                                                       | Psychological Medicine                 |
| McNally et al.               | 2015 | Mental Disorders as Causal Systems: A Network Approach to Posttraumatic Stress Disorder                                                   | Clinical Psychological Science         |
| McNally, Heeren, & Robinaugh | 2017 | A Bayesian network analysis of posttraumatic stress disorder symptoms in adults reporting childhood sexual abuse                          | European Journal of Psychotraumatology |
| McWilliams et al.            | 2017 | A Network Analysis of Depressive Symptoms in individuals Seeking Treatment for Chronic Pain                                               | Clinical Journal of Pain               |
| Melidis, Denham, & Hyland    | 2018 | A test of the adaptive network explanation of functional disorders using a machine learning analysis of symptoms                          | Biosystems                             |
| Mitchell et al.              | 2017 | Network Models of DSM-5 Posttraumatic Stress Disorder: Implications for ICD-11                                                            | Journal of Abnormal Psychology         |
| Moffa et al.                 | 2017 | Using Directed Acyclic Graphs in Epidemiological Research in Psychosis: An Analysis of the Role of Bullying in Psychosis                  | Schizophrenia Bulletin                 |
| Moshier et al.               | 2018 | Examination of posttraumatic stress disorder symptom networks using clinician-rated and patient-rated data.                               | Journal of Abnormal Psychology         |
| Murphy et al.                | 2018 | Distress, Impairment and the Extended Psychosis Phenotype: A Network Analysis of Psychotic Experiences in an US General Population Sample | Schizophrenia Bulletin                 |
| Murri et al.                 | 2018 | The symptom network structure of depressive symptoms in late-life: Results from a European population study.                              | Molecular Psychiatry                   |
| Núñez et al.                 | 2018 | Examining relationships between psychotic experiences and suicidal ideation in adolescents using a network approach.                      | Schizophrenia Research                 |
| Olatunji, Levinson, & Calebs | 2018 | A network analysis of eating disorder symptoms and characteristics in an inpatient sample                                                 | Psychiatry Research                    |

|                               |      |                                                                                                                                                                                                        |                                               |
|-------------------------------|------|--------------------------------------------------------------------------------------------------------------------------------------------------------------------------------------------------------|-----------------------------------------------|
| Pavani et al.                 | 2017 | A Network Approach to Affect Regulation Dynamics and Personality Trait-Induced Variations: Extraversion and Neuroticism Moderate Reciprocal Influences between Affect and Affect Regulation Strategies | European Journal of Personality               |
| Pe et al.                     | 2015 | Emotion-network density in major depressive disorder                                                                                                                                                   | Clinical Psychological Science                |
| Phillips et al.               | 2018 | Posttraumatic Stress Disorder Symptom Network Analysis in U.S. Military Veterans: Examining the Impact of Combat Exposure.                                                                             | Frontiers in Psychiatry                       |
| Preszler et al.               | 2018 | Network Analysis of Psychopathy in Forensic Patients                                                                                                                                                   | Journal of Abnormal Psychology                |
| Renard et al.                 | 2017 | Unique and Overlapping Symptoms in Schizophrenia Spectrum and Dissociative Disorders in Relation to Models of Psychopathology: A Systematic Review                                                     | Schizophrenia Bulletin                        |
| Rhemtulla et al.              | 2016 | Network analysis of substance abuse and dependence symptoms                                                                                                                                            | Drug and Alcohol Dependence                   |
| Richetin et al.               | 2017 | The centrality of affective instability and identity in Borderline Personality Disorder: Evidence from network analysis                                                                                | PLOS One                                      |
| Robinaugh et al.              | 2014 | Network Analysis of Persistent Complex Bereavement Disorder in Conjugally Bereaved Adults                                                                                                              | Journal of Abnormal Psychology                |
| Robinaugh, Millner, & McNally | 2016 | Identifying Highly influential Nodes in the Complicated Grief Network                                                                                                                                  | Journal of Abnormal Psychology                |
| Rodebaugh et al.              | 2018 | Does Centrality in a Cross-Sectional Network Suggest intervention Targets for Social Anxiety Disorder?                                                                                                 | Journal of Consulting and Clinical Psychology |
| Rodgers et al.                | 2018 | A network approach to eating disorder symptomatology: Do desire for thinness and fear of gaining weight play unique roles in the network?                                                              | Body Image                                    |
| Ross, Murphy, & Armour        | 2018 | A network analysis of DSM-5 posttraumatic stress disorder and functional impairment in UK treatment-seeking veterans                                                                                   | Journal of Anxiety Disorders                  |
| Rotstein et al.               | 2018 | Quality of life disparities between persons with schizophrenia and their professional caregivers: Network analysis in a National Cohort.                                                               | Schizophrenia Research                        |



|                             |      |                                                                                                                                                                                                                                                   |                                                                      |
|-----------------------------|------|---------------------------------------------------------------------------------------------------------------------------------------------------------------------------------------------------------------------------------------------------|----------------------------------------------------------------------|
| Rouquette et al.            | 2018 | Emotional and behavioral symptom network structure in elementary school girls and association with anxiety disorders and depression in adolescence and early adulthood: A network analysis.                                                       | JAMA Psychiatry                                                      |
| Rowland, Wenzel, & Kubiak   | 2016 | The effects of computer-based mindfulness training on Self-control and Mindfulness within Ambulatorily assessed network Systems across Health-related domains in a healthy student population (SMASH): study protocol for a randomized controlled | Trials                                                               |
| Russell et al.              | 2017 | The Network Structure of Posttraumatic Stress Symptoms in Children and Adolescents Exposed to Disasters                                                                                                                                           | Journal of The American Academy of Child and Adolescent Psychiatry   |
| Ruzzano, Borsboom, & Geurts | 2015 | Repetitive Behaviors in Autism and Obsessive-Compulsive Disorder: New Perspectives from a Network Analysis                                                                                                                                        | Journal of Autism and Developmental Disorders                        |
| Santos et al.               | 2018 | Longitudinal network structure of depression symptoms and self-efficacy in low-income mothers                                                                                                                                                     | PLOS One                                                             |
| Santos et al.               | 2017 | Network Structure of Perinatal Depressive Symptoms in Latinas: Relationship to Stress and Reproductive Biomarkers                                                                                                                                 | Research in Nursing & Health                                         |
| Schuler et al.              | 2018 | The interrelations among aspects of dyspnea and symptoms of depression in COPD patients - a network analysis                                                                                                                                      | Journal of Affective Disorders                                       |
| Schweren et al.             | 2018 | Assessment of Symptom Network Density as a Prognostic Marker of Treatment Response in Adolescent Depression.                                                                                                                                      | JAMA Psychiatry                                                      |
| Semino et al.               | 2017 | Networks of Depression and Cognition in Elderly Psychiatric Patients                                                                                                                                                                              | Geropsych: The Journal of Gerontopsychology and Geriatric Psychiatry |
| Semino et al.               | 2018 | Depressive Symptoms and Their Interactions With Emotions and Personality Traits Over Time: Interaction Networks in a Psychiatric Clinic.                                                                                                          | The Primary Care Companion for CNS Disorders                         |
| Smeets et al.               | 2015 | Evidence That Environmental and Genetic Risks for Psychotic Disorder May Operate by Impacting on Connections Between Core Symptoms of Perceptual Alteration and Delusional Ideation                                                               | Schizophrenia Bulletin                                               |
| Smith et al.                | 2017 | ODD Symptom Network during Preschool                                                                                                                                                                                                              | Journal of Abnormal Child Psychology                                 |
| Snippe et al.               | 2017 | The Impact of Treatments for Depression on the Dynamic Network Structure of Mental States: Two Randomized Controlled Trials.                                                                                                                      | Scientific Reports                                                   |

|                       |      |                                                                                                                                         |                                                                                         |
|-----------------------|------|-----------------------------------------------------------------------------------------------------------------------------------------|-----------------------------------------------------------------------------------------|
| Solmi et al.          | 2018 | Network analysis of specific psychopathology and psychiatric symptoms in patients with eating disorders                                 | International Journal of Eating Disorders                                               |
| Song et al.           | 2013 | Investigating the Pattern of Syndrome based on the Difference of Symptom Network in Depression                                          | 2013 IEEE International Conference on Bioinformatics and Biomedicine (Conference Paper) |
| Southward & Cheavens  | 2018 | Identifying Core Deficits in a Dimensional Model of Borderline Personality Disorder Features: A Network Analysis                        | Clinical Psychological Science                                                          |
| Spiller et al.        | 2017 | Symptoms of posttraumatic stress disorder in a clinical sample of refugees: a network analysis                                          | European Journal of Psychotraumatology                                                  |
| Stochl et al.         | 2018 | Identifying key targets for interventions to improve psychological wellbeing: replicable results from four UK cohorts.                  | Psychological Medicine                                                                  |
| Stone et al.          | 2017 | Brief report: A network analysis of self-cutting risk among late adolescent girls exposed to dating violence                            | Journal of Adolescence                                                                  |
| Strauss et al.        | 2018 | Network Analysis Reveals the Latent Structure of Negative Symptoms in Schizophrenia.                                                    | Schizophrenia Bulletin                                                                  |
| Sullivan et al.       | 2018 | Network Analysis of PTSD Symptoms Following Mass Violence                                                                               | Psychological Trauma: Theory, Research, Practice, and Policy                            |
| Taylor-Swanson et al. | 2018 | The dynamics of stress and fatigue across menopause: attractors, coupling, and resilience                                               | Menopause: The Journal of The North American Menopause Society                          |
| Tio et al.            | 2016 | Mapping the manuals of madness: Comparing the ICD-10 and DSM-IV-TR using a network approach                                             | International Journal of Methods in Psychiatric Research                                |
| Tzannidakis & Frewen  | 2015 | Trauma-Related Altered States of Consciousness (TRASC) and Functional Impairment II: Perceived Causal Relationships in an Online Sample | Journal of Trauma & Dissociation                                                        |
| Unterrassner et al.   | 2017 | The intricate Relationship between Psychotic-Like Experiences and Associated Subclinical Symptoms in Healthy individuals                | Frontiers in Psychology                                                                 |
| van Borkulo et al.    | 2015 | Association of Symptom Network Structure With the Course of Longitudinal Depression                                                     | JAMA Psychiatry                                                                         |

|                       |      |                                                                                                                                                                       |                                                                                 |
|-----------------------|------|-----------------------------------------------------------------------------------------------------------------------------------------------------------------------|---------------------------------------------------------------------------------|
| van de Grift et al.   | 2016 | A network analysis of body satisfaction of people with gender dysphoria                                                                                               | Body Image                                                                      |
| van de Leemput et al. | 2014 | Critical slowing down as early warning for the onset and termination of depression                                                                                    | Proceedings of The National Academy of Sciences of The United States of America |
| van der Velden et al. | 2018 | Network analysis of symptoms in a Parkinson patient using experience sampling data: An n=1 study.                                                                     | Movement Disorders                                                              |
| van Loo et al.        | 2018 | Robust symptom networks in recurrent major depression across different levels of genetic and environmental risk.                                                      | Journal of Affective Disorders                                                  |
| van Os et al.         | 2014 | Evidence That a Psychopathology interactome Has Diagnostic Value, Predicting Clinical Needs: An Experience Sampling Study                                             | PLOS One                                                                        |
| van Rooijen et al.    | 2018 | A state-independent network of depressive, negative and positive symptoms in male patients with schizophrenia spectrum disorders                                      | Schizophrenia Research                                                          |
| van Rooijen et al.    | 2017 | A symptom network structure of the psychosis spectrum                                                                                                                 | Schizophrenia Research                                                          |
| van Winkel et al.     | 2017 | Unraveling the Role of Loneliness in Depression: The Relationship Between Daily Life Experience and Behavior                                                          | Psychiatry                                                                      |
| Vehling et al.        | 2017 | A concept map of death-related anxieties in patients with advanced cancer                                                                                             | BMJ Supportive & Palliative Care                                                |
| Verschuere et al.     | 2018 | What Features of Psychopathy Might Be Central? A Network Analysis of the Psychopathy Checklist-Revised (PCL-R) in Three Large Samples                                 | Journal of Abnormal Psychology                                                  |
| Virues-Ortega et al.  | 2017 | The New Zealand minds for minds autism spectrum disorder self-reported cohort                                                                                         | Research in Autism Spectrum Disorders                                           |
| Visser et al.         | 2016 | Autism spectrum disorder and attention-deficit/hyperactivity disorder in early childhood: A review of unique and shared characteristics and developmental antecedents | Neuroscience and Biobehavioral Reviews                                          |
| von Stocker et al.    | 2018 | Evaluating the stability of DSM-5 PTSD symptom network structure in a national sample of US military veterans                                                         | Journal of Affective Disorders                                                  |

|                          |      |                                                                                                                                                                                 |                                     |
|--------------------------|------|---------------------------------------------------------------------------------------------------------------------------------------------------------------------------------|-------------------------------------|
| Vrijen et al.            | 2018 | Spread the Joy: How High and Low Bias for Happy Facial Emotions Translate into Different Daily Life Affect Dynamics                                                             | Complexity                          |
| Wang et al.              | 2018 | Theory of mind impairment and its clinical correlates in patients with schizophrenia, major depressive disorder and bipolar disorder                                            | Schizophrenia Research              |
| Wang et al.              | 2018 | Core psychopathology of treatment-seeking patients with binge-eating disorder: a network analysis investigation.                                                                | Psychological Medicine              |
| Watters et al.           | 2016 | An Examination of the Topology and Measurement of the Alexithymia Construct Using Network Analysis                                                                              | Journal of Personality Assessment   |
| Watters, Taylor, & Bagby | 2016 | Illuminating the Theoretical Components of Alexithymia Using Bifactor Modeling and Network Analysis                                                                             | Psychological Assessment            |
| Werner et al.            | 2018 | A Network Approach to Hypersexuality: insights and Clinical Implications                                                                                                        | Journal of Sexual Medicine          |
| Wichers & Groot          | 2016 | Critical Slowing Down as a Personalized Early Warning Signal for Depression                                                                                                     | Psychotherapy and Psychosomatics    |
| Wigman et al.            | 2017 | A Transdiagnostic Network Approach to Psychosis                                                                                                                                 | Schizophrenia Bulletin              |
| Wigman et al.            | 2015 | Exploring the underlying structure of mental disorders: cross-diagnostic differences and similarities from a network perspective using both a top-down and a bottom-up approach | Psychological Medicine              |
| Wigman et al.            | 2013 | Psychiatric diagnosis revisited: Towards a system of staging and profiling combining nomothetic and idiographic parameters of momentary mental states.                          | PLOS One                            |
| Wilson et al.            | 2015 | Dyscalculia and dyslexia in adults: Cognitive bases of comorbidity.                                                                                                             | Learning and Individual Differences |
| Winer et al.             | 2017 | Mapping the relationship between anxiety, anhedonia, and depression.                                                                                                            | Journal of Affective Disorders      |
| Wüsten et al.            | 2018 | Psychotic Experiences and Related Distress: A Cross-national Comparison and Network Analysis Based on 7141 Participants From 13 Countries.                                      | Schizophrenia Bulletin              |

|               |      |                                                                                                                       |                     |
|---------------|------|-----------------------------------------------------------------------------------------------------------------------|---------------------|
| Yang et al.   | 2018 | Socioemotional Dynamics of Emotion Regulation and Depressive Symptoms: A Person-Specific Network Approach.            | Complexity          |
| Yun et al.    | 2017 | Hubness of strategic planning and sociality influences depressive mood and anxiety in College Population              | Scientific Reports  |
| Zhiguo et al. | 2018 | The clinical correlates of comorbid anxiety symptoms and syndromal anxiety in patients with major depressive disorder | Psychiatry Research |
