# Supplementary material
Source: PubMed Central journal article supplement (PMC7334828)
Supplement: NIHMS1597052-supplement-SM_3_pdf.pdf [file NIHMS1597052-supplement-SM_3_pdf.pdf]

| Author            | Year | Title                                                                                                                                       | Journal                                        |
|-------------------|------|---------------------------------------------------------------------------------------------------------------------------------------------|------------------------------------------------|
| <b>Depression</b> |      |                                                                                                                                             |                                                |
| Afzali et al.     | 2017 | A network approach to the comorbidity between posttraumatic stress disorder and major depressive disorder: The role of overlapping symptoms | Journal of Affective Disorders                 |
| Anker et al.      | 2017 | A Network Approach to Modeling Comorbid internalizing and Alcohol Use Disorders                                                             | Journal of Abnormal Psychology                 |
| Armour et al.     | 2017 | A network analysis of DSM-5 posttraumatic stress disorder symptoms and correlates in US military veterans                                   | Journal of Anxiety Disorders                   |
| Bakker et al.     | 2017 | Real-Life Validation of Reduced Reward Processing in Emerging Adults With Depressive Symptoms                                               | Journal of Abnormal Psychology                 |
| Beard et al.      | 2016 | Network analysis of depression and anxiety symptom relationships in a psychiatric sample                                                    | Psychological Medicine                         |
| Bekhuis et al.    | 2018 | Symptom-Specific Effects of Psychotherapy versus Combined Therapy in the Treatment of Mild to Moderate Depression: A Network Approach.      | Psychotherapy and Psychosomatics               |
| Bekhuis et al.    | 2016 | The network structure of major depressive disorder, generalized anxiety disorder and somatic symptomatology.                                | Psychological Medicine                         |
| Borsboom et al.   | 2011 | The Small World of Psychopathology                                                                                                          | PLOS One                                       |
| Bos et al.        | 2018 | Cross-sectional networks of depressive symptoms before and after antidepressant medication treatment.                                       | Social Psychiatry and Psychiatric Epidemiology |
| Boschloo et al.   | 2016 | A Prospective Study on How Symptoms in a Network Predict the Onset of Depression                                                            | Psychotherapy and Psychosomatics               |
| Boschloo et al.   | 2015 | The Network Structure of Symptoms of the Diagnostic and Statistical Manual of Mental Disorders                                              | PLOS One                                       |

|                     |      |                                                                                                                                                            |                                                      |
|---------------------|------|------------------------------------------------------------------------------------------------------------------------------------------------------------|------------------------------------------------------|
| Bringmann et al.    | 2015 | Revealing the dynamic network structure of the Beck Depression inventory-II                                                                                | Psychological Medicine                               |
| Carney et al.       | 2018 | Residual Symptoms After Treatment for Depression in Patients With Coronary Heart Disease                                                                   | Psychosomatic Medicine                               |
| Choi et al.         | 2017 | Applying Network Analysis to Psychological Comorbidity and Health Behavior: Depression, PTSD, and Sexual Risk in Sexual Minority Men With Trauma Histories | Journal of Consulting and Clinical Psychology        |
| Choi et al.         | 2015 | Disease network of mental disorders in Korea                                                                                                               | Social Psychiatry and Psychiatric Epidemiology       |
| Cramer et al.       | 2012 | The pathoplasticity of dysphoric episodes: Differential impact of stressful life events on the pattern of depressive symptom inter-correlations.           | Psychological Medicine                               |
| Curtiss & Klemanski | 2016 | Taxonicity and network structure of generalized anxiety disorder and major depressive disorder: An admixture analysis and complex network analysis         | Journal of Affective Disorders                       |
| Curtiss et al.      | 2018 | Longitudinal Network Stability of the Functional Impairment of Anxiety and Depression                                                                      | Clinical Psychological Science                       |
| David et al.        | 2018 | Intraindividual Dynamic Network Analysis - Implications for Clinical Assessment                                                                            | Journal of Psychopathology and Behavioral Assessment |
| Dejonckheere et al. | 2017 | Perceiving social pressure not to feel negative predicts depressive symptoms in daily life                                                                 | Depression and Anxiety                               |
| Elovainio et al.    | 2018 | The Network Structure of Childhood Psychopathology in International Adoptees                                                                               | Journal of Child and Family Studies                  |
| Fisher et al.       | 2017 | Exploring the Idiographic Dynamics of Mood and Anxiety via Network Analysis                                                                                | Journal of Abnormal Psychology                       |
| Frewen et al.       | 2013 | Perceived causal relations between anxiety, posttraumatic stress and depression: extension to moderation, mediation, and network analysis                  | European Journal of Psychotraumatology               |

|                          |      |                                                                                                                                                          |                                     |
|--------------------------|------|----------------------------------------------------------------------------------------------------------------------------------------------------------|-------------------------------------|
| Fried et al.             | 2016 | What are 'good' depression symptoms? Comparing the centrality of DSM and non-DSM symptoms of depression in a network analysis                            | Journal of Affective Disorders      |
| Fried et al.             | 2015 | From Loss to Loneliness: The Relationship Between Bereavement and Depressive Symptoms                                                                    | Journal of Abnormal Psychology      |
| Goekoop & Goekoop        | 2014 | A Network View on Psychiatric Disorders: Network Clusters of Symptoms as Elementary Syndromes of Psychopathology                                         | PLOS One                            |
| Guloksuz et al.          | 2016 | Exposure to environmental factors increases connectivity between symptom domains in the psychopathology network                                          | BMC Psychiatry                      |
| Gunst et al.             | 2018 | A network analysis of female sexual function: comparing symptom networks in women with decreased, increased, and stable sexual desire                    | Scientific Reports                  |
| Heeren, Jones, & McNally | 2018 | Mapping network connectivity among symptoms of social anxiety and comorbid depression in people with social anxiety disorder                             | Journal of Affective Disorders      |
| Hoffart                  | 2018 | The interplay between experiential states in first generation schema therapy of Cluster C personality problems: A network approach.                      | Clinical Psychology & Psychotherapy |
| Hoorelbeke et al.        | 2016 | The interplay between cognitive risk and resilience factors in remitted depression: A network analysis                                                   | Journal of Affective Disorders      |
| Jaya et al.              | 2017 | Loneliness and Psychotic Symptoms: The Mediating Role of Depression                                                                                      | Cognitive Therapy and Research      |
| Jayawickreme et al.      | 2017 | Post-conflict struggles as networks of problems: A network analysis of trauma, daily stressors and psychological distress among Sri Lankan war survivors | Social Science & Medicine           |
| Johnson & Hoffart        | 2018 | Metacognitive therapy versus cognitive behavioral therapy: A network approach.                                                                           | Frontiers in Psychology             |
| Jones et al.             | 2018 | A network perspective on comorbid depression in adolescents with obsessive-compulsive disorder                                                           | Journal of Anxiety Disorders        |

|                                 |      |                                                                                                                                                     |                                                    |
|---------------------------------|------|-----------------------------------------------------------------------------------------------------------------------------------------------------|----------------------------------------------------|
| Kendler et al.                  | 2018 | The centrality of DSM and non-DSM depressive symptoms in Han Chinese women with major depression.                                                   | Journal of Affective Disorders                     |
| Kuittinen et al.                | 2017 | Construct validity of the HSCL-25 and SCL-90-Somatization scales among Russian, Somali and Kurdish origin migrants in Finland.                      | International Journal of Culture and Mental Health |
| Levinson et al.                 | 2017 | The Core Symptoms of Bulimia Nervosa, Anxiety, and Depression: A Network Analysis                                                                   | Journal of Abnormal Psychology                     |
| Lutz et al.                     | 2018 | Using network analysis for the prediction of treatment dropout in patients with mood and anxiety disorders: A methodological proof-of-concept study | Scientific Reports                                 |
| Lydon-Staley et al.             | 2018 | The Network Structure of Tobacco Withdrawal in a Community Sample of Smokers Treated With Nicotine Patch and Behavioral Counseling                  | Nicotine & Tobacco Research                        |
| Maccallum, Malgaroli, & Bonanno | 2017 | Networks of Loss: Relationships Among Symptoms of Prolonged Grief Following Spousal and Parental Loss                                               | Journal of Abnormal Psychology                     |
| Madhoo & Levine                 | 2016 | Network analysis of the Quick inventory of Depressive Symptomatology: Reanalysis of the STAR*D clinical trial                                       | European Neuropsychopharmacology                   |
| Malgaroli, Maccallum, & Bonanno | 2018 | Symptoms of persistent complex bereavement disorder, depression, and PTSD in a conjugally bereaved sample: a network analysis                       | Psychological Medicine                             |
| McElroy et al.                  | 2018 | Co-occurring internalizing and externalizing psychopathology in childhood and adolescence: a network approach                                       | European Child & Adolescent Psychiatry             |
| McNally et al.                  | 2017 | Co-morbid obsessive-compulsive disorder and depression: a Bayesian network approach                                                                 | Psychological Medicine                             |
| McWilliams et al.               | 2017 | A Network Analysis of Depressive Symptoms in individuals Seeking Treatment for Chronic Pain                                                         | Clinical Journal of Pain                           |
| Mitchell et al.                 | 2017 | Network Models of DSM-5 Posttraumatic Stress Disorder: Implications for ICD-11                                                                      | Journal of Abnormal Psychology                     |

|                  |      |                                                                                                                                                                                             |                                                                                  |
|------------------|------|---------------------------------------------------------------------------------------------------------------------------------------------------------------------------------------------|----------------------------------------------------------------------------------|
| Moffa et al.     | 2017 | Using Directed Acyclic Graphs in Epidemiological Research in Psychosis: An Analysis of the Role of Bullying in Psychosis                                                                    | Schizophrenia Bulletin                                                           |
| Murri et al.     | 2018 | The symptom network structure of depressive symptoms in late-life: Results from a European population study.                                                                                | Molecular Psychiatry                                                             |
| Robinaugh et al. | 2014 | Network Analysis of Persistent Complex Bereavement Disorder in Conjugally Bereaved Adults                                                                                                   | Journal of Abnormal Psychology                                                   |
| Rouquette et al. | 2018 | Emotional and behavioral symptom network structure in elementary school girls and association with anxiety disorders and depression in adolescence and early adulthood: A network analysis. | JAMA Psychiatry                                                                  |
| Santos et al.    | 2017 | Network Structure of Perinatal Depressive Symptoms in Latinas: Relationship to Stress and Reproductive Biomarkers                                                                           | Research in Nursing & Health                                                     |
| Santos et al.    | 2018 | Longitudinal network structure of depression symptoms and self-efficacy in low-income mothers                                                                                               | PLOS One                                                                         |
| Schuler et al.   | 2018 | The interrelations among aspects of dyspnea and symptoms of depression in COPD patients - a network analysis                                                                                | Journal of Affective Disorders                                                   |
| Schweren et al.  | 2018 | Assessment of Symptom Network Density as a Prognostic Marker of Treatment Response in Adolescent Depression.                                                                                | JAMA Psychiatry                                                                  |
| Semino et al.    | 2017 | Networks of Depression and Cognition in Elderly Psychiatric Patients                                                                                                                        | Geropsych: The Journal of Gerontopsychology and Geriatric Psychiatry             |
| Semino et al.    | 2018 | Depressive Symptoms and Their Interactions With Emotions and Personality Traits Over Time: Interaction Networks in a Psychiatric Clinic.                                                    | The Primary Care Companion for CNS Disorders                                     |
| Solmi et al.     | 2018 | Network analysis of specific psychopathology and psychiatric symptoms in patients with eating disorders                                                                                     | International Journal of Eating Disorders                                        |
| Song et al.      | 2013 | Investigating the Pattern of Syndrome based on the Difference of Symptom Network in Depression                                                                                              | 2013 IEEE International Conference on Bioinformatics and Biomedicine (Conference |

|                                      |      |                                                                                                                                      |                                                          |
|--------------------------------------|------|--------------------------------------------------------------------------------------------------------------------------------------|----------------------------------------------------------|
| Stone et al.                         | 2017 | Brief report: A network analysis of self-cutting risk among late adolescent girls exposed to dating violence                         | Journal of Adolescence                                   |
| Tio et al.                           | 2016 | Mapping the manuals of madness: Comparing the ICD-10 and DSM-IV-TR using a network approach                                          | International Journal of Methods in Psychiatric Research |
| van Borkulo et al.                   | 2015 | Association of Symptom Network Structure With the Course of Longitudinal Depression                                                  | JAMA Psychiatry                                          |
| van Loo et al.                       | 2018 | Robust symptom networks in recurrent major depression across different levels of genetic and environmental risk.                     | Journal of Affective Disorders                           |
| van Rooijen et al.                   | 2018 | A state-independent network of depressive, negative and positive symptoms in male patients with schizophrenia spectrum disorders     | Schizophrenia Research                                   |
| van Rooijen et al.                   | 2017 | A symptom network structure of the psychosis spectrum                                                                                | Schizophrenia Research                                   |
| Virues-Ortega et al.                 | 2017 | The New Zealand minds for minds autism spectrum disorder self-reported cohort                                                        | Research in Autism Spectrum Disorders                    |
| Wang et al.                          | 2018 | Theory of mind impairment and its clinical correlates in patients with schizophrenia, major depressive disorder and bipolar disorder | Schizophrenia Research                                   |
| Wigman et al.                        | 2017 | A Transdiagnostic Network Approach to Psychosis                                                                                      | Schizophrenia Bulletin                                   |
| Yun et al.                           | 2017 | Hubness of strategic planning and sociality influences depressive mood and anxiety in College Population                             | Scientific Reports                                       |
| <b>Posttraumatic Stress Disorder</b> |      |                                                                                                                                      |                                                          |
| Afzali et al.                        | 2017 | Network approach to the symptom-level association between alcohol use disorder and posttraumatic stress disorder                     | Social Psychiatry and Psychiatric Epidemiology           |

|                    |      |                                                                                                                                                            |                                                |
|--------------------|------|------------------------------------------------------------------------------------------------------------------------------------------------------------|------------------------------------------------|
| Afzali et al.      | 2017 | A network approach to the comorbidity between posttraumatic stress disorder and major depressive disorder: The role of overlapping symptoms                | Journal of Affective Disorders                 |
| Armour et al.      | 2017 | A network analysis of DSM-5 posttraumatic stress disorder symptoms and correlates in US military veterans                                                  | Journal of Anxiety Disorders                   |
| Benfer et al.      | 2018 | Network models of posttraumatic stress symptoms across trauma types                                                                                        | Journal of Anxiety Disorders                   |
| Birkeland & Heir   | 2017 | Making connections: exploring the centrality of posttraumatic stress symptoms and covariates after a terrorist attack                                      | European Journal of Psychotraumatology         |
| Birkeland et al.   | 2017 | Gender Differences in Posttraumatic Stress Symptoms after a Terrorist Attack: A Network Approach                                                           | Frontiers in Psychology                        |
| Borsboom et al.    | 2011 | The Small World of Psychopathology                                                                                                                         | PLOS One                                       |
| Boschloo et al.    | 2015 | The Network Structure of Symptoms of the Diagnostic and Statistical Manual of Mental Disorders                                                             | PLOS One                                       |
| Bryant et al.      | 2017 | Acute and Chronic Posttraumatic Stress Symptoms in the Emergence of Posttraumatic Stress Disorder A Network Analysis                                       | JAMA Psychiatry                                |
| Choi et al.        | 2017 | Applying Network Analysis to Psychological Comorbidity and Health Behavior: Depression, PTSD, and Sexual Risk in Sexual Minority Men With Trauma Histories | Journal of Consulting and Clinical Psychology  |
| Choi et al.        | 2015 | Disease network of mental disorders in Korea                                                                                                               | Social Psychiatry and Psychiatric Epidemiology |
| De Schryver et al. | 2015 | Unpacking Constructs: A Network Approach for Studying War Exposure, Daily Stressors and Post-Traumatic Stress Disorder                                     | Frontiers in Psychology                        |
| Frewen et al.      | 2013 | Perceived causal relations between anxiety, posttraumatic stress and depression: extension to moderation, mediation, and network analysis                  | European Journal of Psychotraumatology         |

|                                  |      |                                                                                                                                                                                    |                                        |
|----------------------------------|------|------------------------------------------------------------------------------------------------------------------------------------------------------------------------------------|----------------------------------------|
| Fried et al.                     | 2018 | Replicability and Generalizability of Posttraumatic Stress Disorder (PTSD) Networks: A Cross-Cultural Multisite Study of PTSD Symptoms in Four Trauma Patient Samples              | Clinical Psychological Science         |
| Gluck, Knefel, & Lueger-Schuster | 2017 | A network analysis of anger, shame, proposed ICD-11 post-traumatic stress disorder, and different types of childhood trauma in foster care settings in a sample of adult survivors | European Journal of Psychotraumatology |
| Greene et al.                    | 2018 | Dynamic networks of PTSD symptoms during conflict.                                                                                                                                 | Psychological Medicine                 |
| Knefel, Tran, & Lueger-Schuster  | 2016 | The association of posttraumatic stress disorder, complex posttraumatic stress disorder, and borderline personality disorder from a network analytical perspective                 | Journal of Anxiety Disorders           |
| Malgaroli, Maccallum, & Bonanno  | 2018 | Symptoms of persistent complex bereavement disorder, depression, and PTSD in a conjugally bereaved sample: a network analysis                                                      | Psychological Medicine                 |
| McElroy et al.                   | 2018 | Co-occurring internalizing and externalizing psychopathology in childhood and adolescence: a network approach                                                                      | European Child & Adolescent Psychiatry |
| McNally et al.                   | 2015 | Mental Disorders as Causal Systems: A Network Approach to Posttraumatic Stress Disorder                                                                                            | Clinical Psychological Science         |
| McNally, Heeren, & Robinaugh     | 2017 | A Bayesian network analysis of posttraumatic stress disorder symptoms in adults reporting childhood sexual abuse                                                                   | European Journal of Psychotraumatology |
| Mitchell et al.                  | 2017 | Network Models of DSM-5 Posttraumatic Stress Disorder: Implications for ICD-11                                                                                                     | Journal of Abnormal Psychology         |
| Moshier et al.                   | 2018 | Examination of posttraumatic stress disorder symptom networks using clinician-rated and patient-rated data.                                                                        | Journal of Abnormal Psychology         |
| Phillips et al.                  | 2018 | Posttraumatic Stress Disorder Symptom Network Analysis in U.S. Military Veterans: Examining the Impact of Combat Exposure.                                                         | Frontiers in Psychiatry                |
| Ross, Murphy, & Armour           | 2018 | A network analysis of DSM-5 posttraumatic stress disorder and functional impairment in UK treatment-seeking veterans                                                               | Journal of Anxiety Disorders           |



|                    |      |                                                                                                               |                                                                    |
|--------------------|------|---------------------------------------------------------------------------------------------------------------|--------------------------------------------------------------------|
| Russell et al.     | 2017 | The Network Structure of Posttraumatic Stress Symptoms in Children and Adolescents Exposed to Disasters       | Journal of The American Academy of Child and Adolescent Psychiatry |
| Spiller et al.     | 2017 | Symptoms of posttraumatic stress disorder in a clinical sample of refugees: a network analysis                | European Journal of Psychotraumatology                             |
| Stone et al.       | 2017 | Brief report: A network analysis of self-cutting risk among late adolescent girls exposed to dating violence  | Journal of Adolescence                                             |
| Sullivan et al.    | 2018 | Network Analysis of PTSD Symptoms Following Mass Violence                                                     | Psychological Trauma: Theory, Research, Practice, and Policy       |
| Tio et al.         | 2016 | Mapping the manuals of madness: Comparing the ICD-10 and DSM-IV-TR using a network approach                   | International Journal of Methods in Psychiatric Research           |
| von Stocker et al. | 2018 | Evaluating the stability of DSM-5 PTSD symptom network structure in a national sample of US military veterans | Journal of Affective Disorders                                     |

### **Anxiety Disorders**

|                 |      |                                                                                                              |                                |
|-----------------|------|--------------------------------------------------------------------------------------------------------------|--------------------------------|
| Anker et al.    | 2017 | A Network Approach to Modeling Comorbid internalizing and Alcohol Use Disorders                              | Journal of Abnormal Psychology |
| Armour et al.   | 2017 | A network analysis of DSM-5 posttraumatic stress disorder symptoms and correlates in US military veterans    | Journal of Anxiety Disorders   |
| Beard et al.    | 2016 | Network analysis of depression and anxiety symptom relationships in a psychiatric sample                     | Psychological Medicine         |
| Bekhuis et al.  | 2016 | The network structure of major depressive disorder, generalized anxiety disorder and somatic symptomatology. | Psychological Medicine         |
| Borsboom et al. | 2011 | The Small World of Psychopathology                                                                           | PLOS One                       |

|                     |      |                                                                                                                                                                |                                                      |
|---------------------|------|----------------------------------------------------------------------------------------------------------------------------------------------------------------|------------------------------------------------------|
| Boschloo et al.     | 2015 | The Network Structure of Symptoms of the Diagnostic and Statistical Manual of Mental Disorders                                                                 | PLOS One                                             |
| Choi et al.         | 2015 | Disease network of mental disorders in Korea                                                                                                                   | Social Psychiatry and Psychiatric Epidemiology       |
| Curtiss & Klemanski | 2016 | Taxonicity and network structure of generalized anxiety disorder and major depressive disorder: An admixture analysis and complex network analysis             | Journal of Affective Disorders                       |
| Curtiss et al.      | 2018 | Longitudinal Network Stability of the Functional Impairment of Anxiety and Depression                                                                          | Clinical Psychological Science                       |
| David et al.        | 2018 | Intraindividual Dynamic Network Analysis - Implications for Clinical Assessment                                                                                | Journal of Psychopathology and Behavioral Assessment |
| Elovainio et al.    | 2018 | The Network Structure of Childhood Psychopathology in International Adoptees                                                                                   | Journal of Child and Family Studies                  |
| Fisher et al.       | 2017 | Exploring the Idiographic Dynamics of Mood and Anxiety via Network Analysis                                                                                    | Journal of Abnormal Psychology                       |
| Frewen et al.       | 2013 | Perceived causal relations between anxiety, posttraumatic stress and depression: extension to moderation, mediation, and network analysis                      | European Journal of Psychotraumatology               |
| Goekoop & Goekoop   | 2014 | A Network View on Psychiatric Disorders: Network Clusters of Symptoms as Elementary Syndromes of Psychopathology                                               | PLOS One                                             |
| Guloksuz et al.     | 2016 | Exposure to environmental factors increases connectivity between symptom domains in the psychopathology network                                                | BMC Psychiatry                                       |
| Gunst et al.        | 2018 | A network analysis of female sexual function: comparing symptom networks in women with decreased, increased, and stable sexual desire                          | Scientific Reports                                   |
| Heeren & McNally    | 2016 | An integrative network approach to social anxiety disorder: The complex dynamic interplay among attentional bias for threat, attentional control, and symptoms | Journal of Anxiety Disorders                         |

|                              |      |                                                                                                                                                          |                                                    |
|------------------------------|------|----------------------------------------------------------------------------------------------------------------------------------------------------------|----------------------------------------------------|
| Heeren & McNally             | 2018 | Social Anxiety Disorder as a Densely interconnected Network of Fear and Avoidance for Social Situations                                                  | Cognitive Therapy and Research                     |
| Heeren, Bernstein, & McNally | 2018 | Deconstructing trait anxiety: a network perspective                                                                                                      | Anxiety, Stress, and Coping                        |
| Heeren, Jones, & McNally     | 2018 | Mapping network connectivity among symptoms of social anxiety and comorbid depression in people with social anxiety disorder                             | Journal of Affective Disorders                     |
| Hoffart                      | 2018 | The interplay between experiential states in first generation schema therapy of Cluster C personality problems: A network approach.                      | Clinical Psychology & Psychotherapy                |
| Jayawickreme et al.          | 2017 | Post-conflict struggles as networks of problems: A network analysis of trauma, daily stressors and psychological distress among Sri Lankan war survivors | Social Science & Medicine                          |
| Johnson & Hoffart            | 2018 | Metacognitive therapy versus cognitive behavioral therapy: A network approach.                                                                           | Frontiers in Psychology                            |
| Kuittinen et al.             | 2017 | Construct validity of the HSCL-25 and SCL-90-Somatization scales among Russian, Somali and Kurdish origin migrants in Finland.                           | International Journal of Culture and Mental Health |
| Levinson et al.              | 2017 | The Core Symptoms of Bulimia Nervosa, Anxiety, and Depression: A Network Analysis                                                                        | Journal of Abnormal Psychology                     |
| Levinson et al.              | 2018 | Social anxiety and eating disorder comorbidity and underlying vulnerabilities: Using network analysis to conceptualize comorbidity                       | International Journal of Eating Disorders          |
| Lutz et al.                  | 2018 | Using network analysis for the prediction of treatment dropout in patients with mood and anxiety disorders: A methodological proof-of-concept study      | Scientific Reports                                 |
| Lydon-Staley et al.          | 2018 | The Network Structure of Tobacco Withdrawal in a Community Sample of Smokers Treated With Nicotine Patch and Behavioral Counseling                       | Nicotine & Tobacco Research                        |
| McElroy et al.               | 2018 | Co-occurring internalizing and externalizing psychopathology in childhood and adolescence: a network approach                                            | European Child & Adolescent Psychiatry             |

|                                        |      |                                                                                                                                                                                             |                                                          |
|----------------------------------------|------|---------------------------------------------------------------------------------------------------------------------------------------------------------------------------------------------|----------------------------------------------------------|
| Moffa et al.                           | 2017 | Using Directed Acyclic Graphs in Epidemiological Research in Psychosis: An Analysis of the Role of Bullying in Psychosis                                                                    | Schizophrenia Bulletin                                   |
| Núñez et al.                           | 2018 | Examining relationships between psychotic experiences and suicidal ideation in adolescents using a network approach.                                                                        | Schizophrenia Research                                   |
| Rodebaugh et al.                       | 2018 | Does Centrality in a Cross-Sectional Network Suggest intervention Targets for Social Anxiety Disorder?                                                                                      | Journal of Consulting and Clinical Psychology            |
| Rouquette et al.                       | 2018 | Emotional and behavioral symptom network structure in elementary school girls and association with anxiety disorders and depression in adolescence and early adulthood: A network analysis. | JAMA Psychiatry                                          |
| Semino et al.                          | 2018 | Depressive Symptoms and Their Interactions With Emotions and Personality Traits Over Time: Interaction Networks in a Psychiatric Clinic.                                                    | The Primary Care Companion for CNS Disorders             |
| Solmi et al.                           | 2018 | Network analysis of specific psychopathology and psychiatric symptoms in patients with eating disorders                                                                                     | International Journal of Eating Disorders                |
| Tio et al.                             | 2016 | Mapping the manuals of madness: Comparing the ICD-10 and DSM-IV-TR using a network approach                                                                                                 | International Journal of Methods in Psychiatric Research |
| Virues-Ortega et al.                   | 2017 | The New Zealand minds for minds autism spectrum disorder self-reported cohort                                                                                                               | Research in Autism Spectrum Disorders                    |
| Wigman et al.                          | 2017 | A Transdiagnostic Network Approach to Psychosis                                                                                                                                             | Schizophrenia Bulletin                                   |
| Yun et al.                             | 2017 | Hubness of strategic planning and sociality influences depressive mood and anxiety in College Population                                                                                    | Scientific Reports                                       |
| <b>Psychosis and Related Disorders</b> |      |                                                                                                                                                                                             |                                                          |
| Bak et al.                             | 2016 | An n=1 Clinical Network Analysis of Symptoms and Treatment in Psychosis                                                                                                                     | PLOS One                                                 |

|                      |      |                                                                                                                                                                         |                                                |
|----------------------|------|-------------------------------------------------------------------------------------------------------------------------------------------------------------------------|------------------------------------------------|
| Borsboom et al.      | 2011 | The Small World of Psychopathology                                                                                                                                      | PLOS One                                       |
| Choi et al.          | 2015 | Disease network of mental disorders in Korea                                                                                                                            | Social Psychiatry and Psychiatric Epidemiology |
| Esfahlani et al.     | 2018 | A network-based classification framework for predicting treatment response of schizophrenia patients                                                                    | Expert Systems with Applications               |
| Esfahlani et al.     | 2017 | Sensitivity of the Positive and Negative Syndrome Scale (PANSS) in detecting treatment effects via network analysis.                                                    | Innovations in Clinical Neuroscience           |
| Fisher et al.        | 2017 | Exploring the Idiographic Dynamics of Mood and Anxiety via Network Analysis                                                                                             | Journal of Abnormal Psychology                 |
| Frewen et al.        | 2013 | Perceived causal relations between anxiety, posttraumatic stress and depression: extension to moderation, mediation, and network analysis                               | European Journal of Psychotraumatology         |
| Galderisi et al.     | 2018 | Interplay Among Psychopathologic Variables, Personal Resources, Context-Related Factors, and Real-life Functioning in individuals With Schizophrenia A Network Analysis | JAMA Psychiatry                                |
| Goekoop & Goekoop    | 2014 | A Network View on Psychiatric Disorders: Network Clusters of Symptoms as Elementary Syndromes of Psychopathology                                                        | PLOS One                                       |
| Guloksuz et al.      | 2016 | Exposure to environmental factors increases connectivity between symptom domains in the psychopathology network                                                         | BMC Psychiatry                                 |
| Hasson-Ohayon et al. | 2018 | The centrality of cognitive symptoms and metacognition within the interacting network of symptoms, neurocognition, social cognition and metacognition in schizophrenia. | Schizophrenia Research                         |
| Isvoranu et al.      | 2017 | A Network Approach to Psychosis: Pathways Between Childhood Trauma and Psychotic Symptoms                                                                               | Schizophrenia Bulletin                         |
| Jaya et al.          | 2017 | Loneliness and Psychotic Symptoms: The Mediating Role of Depression                                                                                                     | Cognitive Therapy and Research                 |

|                    |      |                                                                                                                                            |                                                          |
|--------------------|------|--------------------------------------------------------------------------------------------------------------------------------------------|----------------------------------------------------------|
| Levine & Leucht    | 2016 | Identifying a system of predominant negative symptoms: Network analysis of three randomized clinical trials.                               | Schizophrenia Research                                   |
| Moffa et al.       | 2017 | Using Directed Acyclic Graphs in Epidemiological Research in Psychosis: An Analysis of the Role of Bullying in Psychosis                   | Schizophrenia Bulletin                                   |
| Murphy et al.      | 2018 | Distress, Impairment and the Extended Psychosis Phenotype: A Network Analysis of Psychotic Experiences in an US General Population Sample  | Schizophrenia Bulletin                                   |
| Núñez et al.       | 2018 | Examining relationships between psychotic experiences and suicidal ideation in adolescents using a network approach.                       | Schizophrenia Research                                   |
| Strauss et al.     | 2018 | Network Analysis Reveals the Latent Structure of Negative Symptoms in Schizophrenia.                                                       | Schizophrenia Bulletin                                   |
| Tio et al.         | 2016 | Mapping the manuals of madness: Comparing the ICD-10 and DSM-IV-TR using a network approach                                                | International Journal of Methods in Psychiatric Research |
| van Rooijen et al. | 2018 | A state-independent network of depressive, negative and positive symptoms in male patients with schizophrenia spectrum disorders           | Schizophrenia Research                                   |
| van Rooijen et al. | 2017 | A symptom network structure of the psychosis spectrum                                                                                      | Schizophrenia Research                                   |
| Wang et al.        | 2018 | Theory of mind impairment and its clinical correlates in patients with schizophrenia, major depressive disorder and bipolar disorder       | Schizophrenia Research                                   |
| Wigman et al.      | 2017 | A Transdiagnostic Network Approach to Psychosis                                                                                            | Schizophrenia Bulletin                                   |
| Wüsten et al.      | 2018 | Psychotic Experiences and Related Distress: A Cross-national Comparison and Network Analysis Based on 7141 Participants From 13 Countries. | Schizophrenia Bulletin                                   |
| Yun et al.         | 2017 | Hubness of strategic planning and sociality influences depressive mood and anxiety in College Population                                   | Scientific Reports                                       |

## Personality Disorders

|                                  |      |                                                                                                                                                                    |                                                          |
|----------------------------------|------|--------------------------------------------------------------------------------------------------------------------------------------------------------------------|----------------------------------------------------------|
| Borsboom et al.                  | 2011 | The Small World of Psychopathology                                                                                                                                 | PLOS One                                                 |
| Fonseca-Pedrero et al.           | 2018 | The Network Structure of Schizotypal Personality Traits                                                                                                            | Schizophrenia Bulletin                                   |
| Knefel, Tran, & Lueger-Schuster  | 2016 | The association of posttraumatic stress disorder, complex posttraumatic stress disorder, and borderline personality disorder from a network analytical perspective | Journal of Anxiety Disorders                             |
| Marcus, Preszler, & Zeigler-Hill | 2018 | A network of dark personality traits: What lies at the heart of darkness?                                                                                          | Journal of Research in Personality                       |
| Preszler et al.                  | 2018 | Network Analysis of Psychopathy in Forensic Patients                                                                                                               | Journal of Abnormal Psychology                           |
| Richetin et al.                  | 2017 | The centrality of affective instability and identity in Borderline Personality Disorder: Evidence from network analysis                                            | PLOS One                                                 |
| Southward & Cheavens             | 2018 | Identifying Core Deficits in a Dimensional Model of Borderline Personality Disorder Features: A Network Analysis                                                   | Clinical Psychological Science                           |
| Tio et al.                       | 2016 | Mapping the manuals of madness: Comparing the ICD-10 and DSM-IV-TR using a network approach                                                                        | International Journal of Methods in Psychiatric Research |
| Verschuere et al.                | 2018 | What Features of Psychopathy Might Be Central? A Network Analysis of the Psychopathy Checklist-Revised (PCL-R) in Three Large Samples                              | Journal of Abnormal Psychology                           |
| Yun et al.                       | 2017 | Hubness of strategic planning and sociality influences depressive mood and anxiety in College Population                                                           | Scientific Reports                                       |

## Substance Use Disorders

|                  |      |                                                                                                                                                          |                                                                   |
|------------------|------|----------------------------------------------------------------------------------------------------------------------------------------------------------|-------------------------------------------------------------------|
| Afzali et al.    | 2017 | Network approach to the symptom-level association between alcohol use disorder and posttraumatic stress disorder                                         | Social Psychiatry and Psychiatric Epidemiology                    |
| Anker et al.     | 2017 | A Network Approach to Modeling Comorbid internalizing and Alcohol Use Disorders                                                                          | Journal of Abnormal Psychology                                    |
| Baggio et al.    | 2018 | Gender differences in gambling preferences and problem gambling: a network-level analysis                                                                | International Gambling Studies                                    |
| Baggio et al.    | 2018 | Comorbidity of Symptoms of Alcohol and Cannabis Use Disorders among a Population-Based Sample of Simultaneous Users. Insight from a Network Perspective. | International Journal of Environmental Research and Public Health |
| Borsboom et al.  | 2011 | The Small World of Psychopathology                                                                                                                       | PLOS One                                                          |
| Boschloo et al.  | 2015 | The Network Structure of Symptoms of the Diagnostic and Statistical Manual of Mental Disorders                                                           | PLOS One                                                          |
| Choi et al.      | 2015 | Disease network of mental disorders in Korea                                                                                                             | Social Psychiatry and Psychiatric Epidemiology                    |
| Frewen et al.    | 2013 | Perceived causal relations between anxiety, posttraumatic stress and depression: extension to moderation, mediation, and network analysis                | European Journal of Psychotraumatology                            |
| Gunst et al.     | 2018 | A network analysis of female sexual function: comparing symptom networks in women with decreased, increased, and stable sexual desire                    | Scientific Reports                                                |
| Moffa et al.     | 2017 | Using Directed Acyclic Graphs in Epidemiological Research in Psychosis: An Analysis of the Role of Bullying in Psychosis                                 | Schizophrenia Bulletin                                            |
| Rhemtulla et al. | 2016 | Network analysis of substance abuse and dependence symptoms                                                                                              | Drug and Alcohol Dependence                                       |
| Tio et al.       | 2016 | Mapping the manuals of madness: Comparing the ICD-10 and DSM-IV-TR using a network approach                                                              | International Journal of Methods in Psychiatric Research          |



## Eating Disorders

|                               |      |                                                                                                                                                  |                                                |
|-------------------------------|------|--------------------------------------------------------------------------------------------------------------------------------------------------|------------------------------------------------|
| Borsboom et al.               | 2011 | The Small World of Psychopathology                                                                                                               | PLOS One                                       |
| Choi et al.                   | 2015 | Disease network of mental disorders in Korea                                                                                                     | Social Psychiatry and Psychiatric Epidemiology |
| DuBois et al.                 | 2017 | A network analysis investigation of the cognitive-behavioral theory of eating disorders                                                          | Behaviour Research and Therapy                 |
| Forbush, Siew, & Vitevitch    | 2016 | Application of network analysis to identify interactive systems of eating disorder psychopathology                                               | Psychological Medicine                         |
| Forrest et al.                | 2018 | Core psychopathology in anorexia nervosa and bulimia nervosa: A network analysis                                                                 | International Journal of Eating Disorders      |
| Goldschmidt et al.            | 2018 | Network Analysis of Pediatric Eating Disorder Symptoms in a Treatment-Seeking, Transdiagnostic Sample                                            | Journal of Abnormal Psychology                 |
| Levinson et al.               | 2017 | The Core Symptoms of Bulimia Nervosa, Anxiety, and Depression: A Network Analysis                                                                | Journal of Abnormal Psychology                 |
| Levinson et al.               | 2018 | Social anxiety and eating disorder comorbidity and underlying vulnerabilities: Using network analysis to conceptualize comorbidity               | International Journal of Eating Disorders      |
| Levinson, Vanzhula, & Broscof | 2018 | Longitudinal and personalized networks of eating disorder cognitions and behaviors: Targets for precision intervention a proof of concept study. | International Journal of Eating Disorders      |
| Olatunji, Levinson, & Calebs  | 2018 | A network analysis of eating disorder symptoms and characteristics in an inpatient sample                                                        | Psychiatry Research                            |
| Rodgers et al.                | 2018 | A network approach to eating disorder symptomatology: Do desire for thinness and fear of gaining weight play unique roles in the network?        | Body Image                                     |

|                         |      |                                                                                                                                           |                                                          |
|-------------------------|------|-------------------------------------------------------------------------------------------------------------------------------------------|----------------------------------------------------------|
| Solmi et al.            | 2018 | Network analysis of specific psychopathology and psychiatric symptoms in patients with eating disorders                                   | International Journal of Eating Disorders                |
| Tio et al.              | 2016 | Mapping the manuals of madness: Comparing the ICD-10 and DSM-IV-TR using a network approach                                               | International Journal of Methods in Psychiatric Research |
| Wang et al.             | 2018 | Core psychopathology of treatment-seeking patients with binge-eating disorder: a network analysis investigation.                          | Psychological Medicine                                   |
| <b>Bipolar Disorder</b> |      |                                                                                                                                           |                                                          |
| Borsboom et al.         | 2011 | The Small World of Psychopathology                                                                                                        | PLOS One                                                 |
| Boschloo et al.         | 2015 | The Network Structure of Symptoms of the Diagnostic and Statistical Manual of Mental Disorders                                            | PLOS One                                                 |
| Choi et al.             | 2015 | Disease network of mental disorders in Korea                                                                                              | Social Psychiatry and Psychiatric Epidemiology           |
| Frewen et al.           | 2013 | Perceived causal relations between anxiety, posttraumatic stress and depression: extension to moderation, mediation, and network analysis | European Journal of Psychotraumatology                   |
| Goekoop & Goekoop       | 2014 | A Network View on Psychiatric Disorders: Network Clusters of Symptoms as Elementary Syndromes of Psychopathology                          | PLOS One                                                 |
| Koenders et al.         | 2015 | A Network Approach to Bipolar Symptomatology in Patients with Different Course Types                                                      | PLOS One                                                 |
| Tio et al.              | 2016 | Mapping the manuals of madness: Comparing the ICD-10 and DSM-IV-TR using a network approach                                               | International Journal of Methods in Psychiatric Research |
| van Rooijen et al.      | 2017 | A symptom network structure of the psychosis spectrum                                                                                     | Schizophrenia Research                                   |

|                                               |      |                                                                                                                 |                                                          |
|-----------------------------------------------|------|-----------------------------------------------------------------------------------------------------------------|----------------------------------------------------------|
| Virues-Ortega et al.                          | 2017 | The New Zealand minds for minds autism spectrum disorder self-reported cohort                                   | Research in Autism Spectrum Disorders                    |
| <b>Obsessive-Compulsive Disorder</b>          |      |                                                                                                                 |                                                          |
| Borsboom et al.                               | 2011 | The Small World of Psychopathology                                                                              | PLOS One                                                 |
| Choi et al.                                   | 2015 | Disease network of mental disorders in Korea                                                                    | Social Psychiatry and Psychiatric Epidemiology           |
| Guloksuz et al.                               | 2016 | Exposure to environmental factors increases connectivity between symptom domains in the psychopathology network | BMC Psychiatry                                           |
| Jones et al.                                  | 2018 | A network perspective on comorbid depression in adolescents with obsessive-compulsive disorder                  | Journal of Anxiety Disorders                             |
| McNally et al.                                | 2017 | Co-morbid obsessive-compulsive disorder and depression: a Bayesian network approach                             | Psychological Medicine                                   |
| Ruzzano, Borsboom, & Geurts                   | 2015 | Repetitive Behaviors in Autism and Obsessive-Compulsive Disorder: New Perspectives from a Network Analysis      | Journal of Autism and Developmental Disorders            |
| Solmi et al.                                  | 2018 | Network analysis of specific psychopathology and psychiatric symptoms in patients with eating disorders         | International Journal of Eating Disorders                |
| Tio et al.                                    | 2016 | Mapping the manuals of madness: Comparing the ICD-10 and DSM-IV-TR using a network approach                     | International Journal of Methods in Psychiatric Research |
| Virues-Ortega et al.                          | 2017 | The New Zealand minds for minds autism spectrum disorder self-reported cohort                                   | Research in Autism Spectrum Disorders                    |
| <b>Behavioral and Externalizing Disorders</b> |      |                                                                                                                 |                                                          |

|                                 |      |                                                                                                               |                                                          |
|---------------------------------|------|---------------------------------------------------------------------------------------------------------------|----------------------------------------------------------|
| Borsboom et al.                 | 2011 | The Small World of Psychopathology                                                                            | PLOS One                                                 |
| Elovainio et al.                | 2018 | The Network Structure of Childhood Psychopathology in International Adoptees                                  | Journal of Child and Family Studies                      |
| Hukkelberg & Ogden              | 2018 | Dimensionality of oppositional defiant disorder                                                               | Child and Adolescent Mental Health                       |
| Martel et al.                   | 2017 | Impulsivity Symptoms as Core to the Developmental Externalizing Spectrum                                      | Journal of Abnormal Child Psychology                     |
| Martel et al.                   | 2016 | A Network Analysis of Developmental Change in ADHD Symptom Structure From Preschool to Adulthood              | Clinical Psychological Science                           |
| McElroy et al.                  | 2018 | Co-occurring internalizing and externalizing psychopathology in childhood and adolescence: a network approach | European Child & Adolescent Psychiatry                   |
| Smith et al.                    | 2017 | ODD Symptom Network during Preschool                                                                          | Journal of Abnormal Child Psychology                     |
| Tio et al.                      | 2016 | Mapping the manuals of madness: Comparing the ICD-10 and DSM-IV-TR using a network approach                   | International Journal of Methods in Psychiatric Research |
| Virues-Ortega et al.            | 2017 | The New Zealand minds for minds autism spectrum disorder self-reported cohort                                 | Research in Autism Spectrum Disorders                    |
| <b>Autism Spectrum Disorder</b> |      |                                                                                                               |                                                          |
| Anderson, Montazeri, & de Bildt | 2015 | Network Approach to Autistic Traits: Group and Subgroup Analyses of ADOS Item Scores                          | Journal of Autism and Developmental Disorders            |
| Borsboom et al.                 | 2011 | The Small World of Psychopathology                                                                            | PLOS One                                                 |

|                             |      |                                                                                                                               |                                                          |
|-----------------------------|------|-------------------------------------------------------------------------------------------------------------------------------|----------------------------------------------------------|
| Deserno et al.              | 2018 | Relating ASD symptoms to well-being: moving across different construct levels                                                 | Psychological Medicine                                   |
| Haslbeck & Fried            | 2017 | How predictable are symptoms in psychopathological networks? A reanalysis of 18 published datasets                            | Psychological Medicine                                   |
| Ibrahim et al.              | 2016 | Mapping the network of neuropsychological impairment in children with autism spectrum disorder: A graph theoretical analysis. | Journal of Autism and Developmental Disorders            |
| Maij et al.                 | 2017 | Mentalizing skills do not differentiate believers from non-believers, but credibility enhancing displays do                   | PLOS One                                                 |
| Ruzzano, Borsboom, & Geurts | 2015 | Repetitive Behaviors in Autism and Obsessive-Compulsive Disorder: New Perspectives from a Network Analysis                    | Journal of Autism and Developmental Disorders            |
| Tio et al.                  | 2016 | Mapping the manuals of madness: Comparing the ICD-10 and DSM-IV-TR using a network approach                                   | International Journal of Methods in Psychiatric Research |

### **Prolonged Grief Disorder**

|                                 |      |                                                                                                                               |                                |
|---------------------------------|------|-------------------------------------------------------------------------------------------------------------------------------|--------------------------------|
| Bellet et al.                   | 2018 | Bereavement Outcomes as Causal Systems: A Network Analysis of the Co-Occurrence of Complicated Grief and Posttraumatic Growth | Clinical Psychological Science |
| Maccallum, Malgaroli, & Bonanno | 2017 | Networks of Loss: Relationships Among Symptoms of Prolonged Grief Following Spousal and Parental Loss                         | Journal of Abnormal Psychology |
| Malgaroli, Maccallum, & Bonanno | 2018 | Symptoms of persistent complex bereavement disorder, depression, and PTSD in a conjugally bereaved sample: a network analysis | Psychological Medicine         |
| Robinaugh et al.                | 2014 | Network Analysis of Persistent Complex Bereavement Disorder in Conjugally Bereaved Adults                                     | Journal of Abnormal Psychology |
| Robinaugh, Millner, & McNally   | 2016 | Identifying Highly influential Nodes in the Complicated Grief Network                                                         | Journal of Abnormal Psychology |

---

*Note* . Articles were included for each disorder if (a) the network comprised symptoms of that disorder or (b) the disorder itself was a node in the network.
